## 30 INTRODUCTION

31 The HIV-1 envelope glycoprotein (Env) plays crucial roles as the surface glycoprotein on  
32 the virus particle, mediating virus binding, fusion and entry, as well as in initiating the formation  
33 of cell-cell adhesions that facilitate viral transmission, called virological synapses (VS) (1-3).  
34 HIV-1 can infect cells through cell-free virus, or through cell-to-cell routes which involve direct  
35 transfer of virus across a VS. HIV-1 Env is the surface antigen exposed on the surface of the  
36 cell or on virus particles where it can engage its main target CD4. HIV-1 is an enveloped virus  
37 that assembles and buds from the plasma membrane in a process mediated by the core  
38 structural protein Gag (4). An endocytic trafficking pathway helps to package Env into newly  
39 formed virus particles (5-7). The expression of Env at the cell surface renders infected cells  
40 susceptible to antibody detection, and while many antibodies against Env can block the  
41 formation of virological synapses, they are less efficient at blocking cell-to-cell infection than  
42 they are at blocking cell-free infection (8-12).

43 The biogenesis of HIV-1 Env begins at ribosomes on the rough endoplasmic reticulum (ER)  
44 where newly synthesized Env is glycosylated into precursor gp160 to form homotrimers (13).  
45 The cleavage of gp160 occurs in the Golgi apparatus by furin or furin-like proteases and results  
46 in two non-covalently associated peptides: a cell surface glycoprotein, gp120, and a  
47 transmembrane glycoprotein, gp41 (14, 15). Env trimers travel through the secretory pathway  
48 to reach the plasma membrane, and then are quickly recycled from the cell surface (16-20).  
49 This contributes to the very low number of Env glycoproteins on the cell surface. Lentivirus gp41  
50 has a long intracytoplasmic C-terminal tail compared to other retroviruses (21). A membrane-  
51 proximal tyrosine-based sorting signal YxxL in the gp41 C-terminus interacts with the AP-2 to  
52 promote the internalization of Env (22-24). Env recycling from the cell surface to the endocytic  
53 recycling compartment (ERC) is a prerequisite for Env incorporation (6, 7). Proper incorporation  
54 of Env into viral particles also requires gp41 C-terminal sequences. The outward trafficking of

55 Env from ERC to virus assembly area is mediated by C-terminal tyrosine-based motif YW795  
56 (5).

57 HIV-1 cell-to-cell transmission leads to the efficient transfer of virus and infection (3, 10, 25)  
58 and mediates resistance to neutralization (8-12). Cell-to-cell transmission promotes viral  
59 diversity by supporting the co-transmission of multiple copies of HIV-1 per transmission event  
60 (26-28) and is proposed to play a role in escape from immune responses or may promote the  
61 evolution of drug resistance in settings of suboptimal therapy (9, 29, 30). The HIV-1 VS is an  
62 example of polarized viral transmission, where the assembly and release of Env and Gag are  
63 directed toward the receiving target cell, which internalizes the virus through an endocytic  
64 pathway (31, 32). At the VS, HIV-1 Gag, Env and CD4 localize to the site of cell-cell contact in  
65 an actin-dependent manner (3). Recruitment of Gag and Env protein and their transfer through  
66 VS occurs in a dynamic process following cell-adhesion (33, 34). Env-CD4 interaction is  
67 required for VS formation. Blocking the interaction of Env and CD4 with antibodies inhibits VS  
68 formation (10). During the formation of a VS, Env is observed to accumulate at the VS,  
69 however, the mechanisms of enrichment of Env at the VS are not well characterized. The  
70 extent to which Env diffuses laterally, is recruited to the VS from surface pools or may be  
71 concentrated by a secretory pathway that targets the VS is unclear.

72 The fusion of proteins with the green fluorescent protein enables live tracking of the protein  
73 within the cell (35). However, the relatively large size of GFP and its derivatives (30kD) requires  
74 careful consideration of the site of insertion to maintain the function of the protein of interest.  
75 Prior Env-GFP fusions have been expressed outside of the full proviral context or required  
76 complementation of WT Env to support viral replication (33). In order to preserve Env function, a  
77 strategy of insertion of GFP into the fourth variable loop was intended to yield a full-length  
78 infectious HIV clone with a functional Env (36).

79 Short peptide motifs in the Env cytoplasmic tail (CT) can control surface Env levels, direct  
80 incorporation of Env into viral particles, and can impact the conformation of the surface (36)  
81 domain of Env, which can further modulate Env fusogenic potential (37, 38). In this study, we  
82 engineered an infectious HIV-1 carrying a fluorescent-Env to observe the *de novo* expression of  
83 Env in an infected cell and track Env accumulation and turnover during VS formation. We  
84 followed the turnover rate of Env trafficking at the VS using fluorescence recovery after  
85 photobleaching (FRAP), which revealed that surface Env is constitutively recycled and the  
86 residence time at the cell surface is short lived measured in minutes, even at sites of high  
87 surface accumulation.

88

## 89 **RESULTS**

### 90 **Engineering an infectious HIV carrying a sfGFP insertion into the Env V4 or V5 domains**

91 To study the trafficking of Env to the VS we set out to design a fluorescent protein-tagged  
92 Env that is compatible with efficient packaging and viral membrane fusion. To minimize  
93 disruption of Env structural stability, we inserted a superfolder allele of GFP (39) directly into the  
94 HIV-1 Env coding sequences at selected points of V4 or V5 domain, which have previously  
95 been described as producing fluorescent Env (Fig.1A). The four HIV-1 clones carrying the Env-  
96 GFP fusion proteins produced similar levels of virus compared to the parent clone, HIV NL4-3  
97 (Fig.1B). Three constructs produced virus with 25 to 50% of infectivity relative to HIV NL4-3  
98 with a wild-type Env (Fig.1C). Western Blotting of cells producing HIV-1 Env-V4.1-sfGFP, HIV-1  
99 Env-V4.2-sfGFP and HIV-1 Env-V5.2-sfGFP revealed the expected increase in size of the Env  
100 glycoprotein in the cell lysates as compared to WT Env from HIV-1 NL4-3 (Fig.1D). We noted  
101 that in cell lysates recombinant Env was processed to gp120-GFP fusion, but with a moderately  
102 lower efficiency. The recombinant Envs, Env-V4.1-sfGFP, Env-V4.2-sfGFP and Env-V5.2-

103 sfGFP were also packaged efficiently onto virus particles. One recombinant construct Env-  
104 V5.3-sfGFP failed to produce full-sized Envelope proteins.

105 We next examined the efficiency of the four different HIV Env-sfGFP constructs to infect T  
106 cell lines. Infection of the highly permissive MT4 cell line was robust with cell-free virus showing  
107 high infectivity (Fig. 1E). Infection of Jurkat cells was lower in magnitude, with greater infection  
108 with HIV carrying V4.2-sfGFP followed by V4.1-sfGFP and V5.2-sfGFP (Fig. 1E). In both MT4  
109 cells and in Jurkat cells, efficiency of infection of HIV V5.3-sfGFP was very low (Fig. 1E). To test  
110 if the four HIV clones carrying the Env-GFP fusion proteins can mediate spreading infection,  
111 Jurkat cells transfected with each of clones were co-cultured with MT4 cells or Jurkat cells. The  
112 spread of virus from transfected donor cells into target cells was measured using flow cytometry  
113 (Fig. 1F). The infection spread efficiently in MT4 cells with HIV-1 Env-V4.2-sfGFP replicating to  
114 a high peak titers as compared to wild type Env construct NL-sfGI, but with slower kinetics. In  
115 Jurkat cells, the HIV Env-V4/V5 sfGFP constructs all supported a spreading infection albeit with  
116 a lower efficiency compared with wild type Env construct NL-sfGI (Fig. 1G).

### 117 **Imaging HIV-1 carrying fluorescent Env constructs**

118 To study the localization of HIV Gag and Env simultaneously during cell-to-cell spread of HIV-  
119 1, we created a series of three dual fluorescent HIV clones carrying a sfGFP fluorescent Env and  
120 a mCherry fluorescent Gag. We performed immunofluorescence staining of cells infected with  
121 HIV-1 Env V4.2 sfGFP-Gag-iCherry, carrying the Env V4.2 sfGFP, the chimeric Env which  
122 maintained highest infectivity, to compare the localization of V4.2-sfGFP Env to WT Env.  
123 Monoclonal antibody 2G12 binds to a non-conformational epitope and showed colocalization with  
124 Env-V4.2-sfGFP fluorescence in a sample cell (Fig. 2A-E). V4.2-sfGFP Env is abundantly  
125 expressed in cytoplasmic compartments, with the highest fluorescence shown in a peri-nuclear  
126 area, consistent with wild type Env distribution reported previously (16). To assess the

127 distribution of Env and Gag relative to the plasma membrane, we performed structured  
128 illumination, super resolution imaging (Deltavision OMXv4.0 BLAZE) of Jurkat cells transfected  
129 with HIV-1 Env V4.2 sfGFP-Gag-iCherry and stained with a plasma membrane dye, Cell Mask  
130 deep Red (Fig. 2F-I). The predominant signal for Env was found in an intracellular compartment  
131 consistent with the trans-Golgi network (TGN), with minimal expression at the cell surface. A line  
132 projection of the fluorescence intensity across the plasma membrane revealed that Gag was  
133 located at the inner leaflet of plasma membrane. Env was not obviously enriched at the plasma  
134 membrane (Fig. 2F-J). Surface staining of Env on live cells expressing HIV Env-V4.2-sfGFP with  
135 anti-GFP antibody, showed puncta of Env at relatively low density (Fig. 2K-M). A time-lapse  
136 study of the kinetics of *de novo* expression of HIV Env-V4.2-sfGFP was performed using a  
137 confocal fluorescence imaging system from 6h to 26h post transfection (Fig. 2N). Env  
138 expression in the transfected cells peaked at 16-20h post transfection and declined thereafter  
139 (Supplemental Movie S1). Individual cells showed a similar peak expression of Env-sfGFP in the  
140 cells in the imaging field (Supplemental Fig. 1). To examine the distribution of HIV Env-V4.2-  
141 sfGFP during the formation of virological synapses, we co-cultured Env-V4.2-sfGFP transfected  
142 Jurkat cells with primary CD4<sup>+</sup> target cells. Accumulation of Env at the junctions between HIV  
143 Env-V4.2-sfGFP transfected Jurkat cells and uninfected primary CD4<sup>+</sup> T cells was observed (Fig.  
144 2O-P). In primary CD4<sup>+</sup> cells transduced with Env-V4.2-sfGFP viruses, a similar synaptic  
145 accumulation of Env was seen at the junction between the HIV-expressing primary T cell and the  
146 target primary T cell (Fig. 2Q).

#### 147 **A dual fluorescent protein-expressing HIV with Gag-iCherry and Env-sfGFP participates** 148 **in VS-mediated HIV transfer**

149 HIV-1 constructs that carry a Cherry fluorescent protein inserted into Gag are not infectious,  
150 but generate highly fluorescent virus particles and participate in cell-to-cell transfer (10, 40). To  
151 determine if the fluorescent Env constructs are capable of participating in cell-to-cell HIV

152 transfer across virological synapses, we generated dual fluorescent HIV which carry two  
153 fluorescent protein tags, Cherry and sfGFP, inserted into Gag and Env, respectively. The dual  
154 fluorescent viruses make abundant virus particles when transfected (Fig. 3A). The infectivity of  
155 these constructs in reporter cell lines are shown in Fig. 3B. These constructs maintained the  
156 ability to form VS and transfer Env and Gag into a target cell (Fig. 3C). HIV V4.2 sfGFP-Gag-  
157 iCherry expressing cells were tested for their ability to mediate HIV transfer across VS and  
158 transfer of fluorescent Gag and Env was observed (Fig. 3C). When the cell co-culture is treated  
159 with CD4 antibody, Leu3a, which can block CD4 engagement with Env, both Gag and Env  
160 transfer are blocked (Fig. 3C and D). Confocal fluorescence microscopy of the dual fluorescent  
161 constructs in Jurkat T cells and primary CD4+ T cells enabled visualization VS where both Env  
162 and Gag were colocalized (Fig. 3E, upper panel). In an example of a cell forming two virological  
163 synapses, one synapse showed both Gag and Env at the cell-cell junction, and the other  
164 showed accumulation of only Gag at the cell-cell junction (Fig. 3E, lower panel). During the  
165 imaging of virological synapses, Gag and Env colocalization at a virological synapse was more  
166 frequently observed soon after cell-cell mixing, and over time, the frequency of VS with only  
167 Gag concentrated at the VS increased. Images of VSs showed that Env and Gag were more  
168 frequently co-localized at 1 hour post coculture (82.4%); while after 3-hour coculture, the  
169 colocalization of Env and Gag at VS was observed in a lower percentage of cells (37.5%). Over  
170 time, both Gag and Env were observed to transfer into a target cell. The majority of fluorescent  
171 HIV proteins transferred into the target cells showed colocalization of Env and Gag, whereas  
172 some puncta appeared to represent the transfer of only Gag or only Env (Fig. 3G). Cotransfer  
173 of Env and Gag may be indicative of infectious virus, while the transfer of only Gag or only Env  
174 may represent the uptake of non-infectious viral antigen.

175 **Pulse-Chase labeling of surface Env tracks endocytosis and relocalization to the VS.**

176 The Env-CD4 interaction is a prerequisite of VS formation, but how Env is recruited to the  
177 VS is not clear. Prior imaging studies indicate that Gag is recruited from membrane associated  
178 pools and diffuses laterally into the VS (34). To examine the pathway of Env recruitment, we  
179 labeled cell surface Env with an anti-GFP fluorophore conjugated antibody and performed a  
180 pulse-chase imaging study to follow movements of surface-localized Env over time. Cell surface  
181 Env of a Jurkat cell nucleofected with HIV-1 V4.2-Gag-iCherry was visualized by staining at 4°C  
182 (Fig. 4A). Env is known to be quickly endocytosed from the cell surface (13). After warming  
183 cells to 37°C, cells were fixed after 5, 10 and 20 minutes to monitor the movement of pulse  
184 labeled Env. The surface Env stained cells were separated into two groups: one group that was  
185 mixed with target cells immediately after surface staining, and co-cultured at 37°C for 30  
186 minutes. The second group was allowed to recover at 37°C for 30 minutes, then mixed with  
187 target cells for another 30 minutes. Both groups of cells were fixed afterwards and imaged with  
188 confocal microscopy. In group 1, surface labeled Env was mainly found in endocytic recycling  
189 compartments (ERC), while at the synapse area, no labeled Env was observed (Fig. 4C). In the  
190 second group, recycled surface Env localized mainly to the cell-cell junction when virological  
191 synapses were observed (Fig. 4D). These results indicate that surface-labeled Env can be  
192 endocytosed into the ERC, and then traffics specifically to the VS.

### 193 **Fluorescence recovery after photobleaching (FRAP) of HIV Env V4.2 sfGFP-Gag-iCherry** 194 **at VS reveals constitutive turnover of Env at the VS**

195 The results above indicate cell surface Env can be internalized into the ERC, reappear at  
196 cell surface, and then accumulate at the VS. How Gag recruitment may influence Env at the VS  
197 is not known. It is possible for instance that the recruitment of Gag to the VS may trap Env  
198 during its incorporation onto nascent virus particles, or that the interaction of Env with CD4 may  
199 immobilize it at the cell surface. To simultaneously track the kinetics of Env and Gag  
200 recruitment to the VS, we performed fluorescence recovery after photobleaching (FRAP)



201 experiments with HIV V4.2 Env sfGFP-Gag-iCherry to measure the rate of turnover of Env and  
202 Gag at VS. We identified cells with a VS that showed both Gag and Env colocalized at the cell  
203 contact area. Half of the VS was photo-bleached, and the other half of the VS allowed  
204 segmentation of the VS and measurement of recovered fluorescence over time. Additional  
205 unbleached areas were tracked over time as a control to determine the basal rate of photodecay.  
206 With a smaller VS, the entire VS was bleached, and a nearby area was used as a control. As  
207 shown in Fig. 5A-1, the white square indicates the bleached area, and the yellow closed region  
208 is the selected region of interest (ROI). ROI-1 is the bleached synapse area, while ROI-2 is the  
209 unbleached control area. A steady recovery of Env intensity was observed within about 200  
210 seconds, while in the same time period, there was minimal fluorescence recovery of Gag. Four  
211 additional FRAP studies on four different virological synapses were performed (Fig. 5A-2 to A-5,  
212 see Supplemental Movies 2-6). The recovery curve of Env was fitted to a one-phase  
213 exponential association function for each ROI (Fig. 5A-1 to A-5, right panels, ROI curves). The  
214 Env intensity before bleaching was set to 100%. The maximum recovery over the time frame of  
215 imaging was used to calculate an immobile fraction which differed between the different  
216 samples (Fig. 5B). In all the VS we observed, Gag fluorescence recovery was not observed,  
217 while Env fluorescence recovery occurred within 2-3 minutes with the half recovery time (Fig.  
218 5C), indicating a much greater rate of Env turnover at the VS relative to Gag.

219

## 220 **High turnover of Env at the VS requires endocytosis of Env using a membrane proximal** 221 **tyrosine Y712**

222 The gp41 C-terminal membrane-proximal tyrosine 712 in a YXXL AP-2 binding-motif is  
223 important for the internalization of surface Env through AP-2 mediated endocytosis (22). To test  
224 if surface Env endocytosis is required for synapse recruitment or turnover of Env at the VS, we  
225 introduced the Y712A point mutation into the viral clone, HIV Env-V4.2-sfGFP. HIV-1 with the

226 Env Y712A mutation is reported to be less infectious as compared to wild type virus (38). We  
227 performed a T cell-to-T cell viral transfer assay using Jurkat donor cells and primary CD4 T cells  
228 as target cells and observed that cell-to-cell transfer of Env is increased by 3-fold in Y712A  
229 mutant relative to non-mutated virus in 3-hour co-culture (Fig. 6A). A separate cell-to-cell  
230 infection assay was performed to measure productive infection between HIV-expressing Jurkat  
231 cells and primary CD4 T cells. In this assay, both the wild type and the Y712A virus spread with  
232 similar efficiencies (Fig. 6B). In highly permissive MT4 cells, the Y712A virus spread with a  
233 slightly higher rate than wild type in 7-day productive infection (Fig. 6C). We next performed live  
234 imaging to see if the mutation which disrupts Env endocytosis from cell surface permits VS  
235 formation and accumulations of Env and Gag at the cell-cell junctions. We readily observed VS  
236 formation with high levels of Env recruitment to the synapse. When conducting FRAP studies  
237 we found that the Env recovery was dramatically decreased in the HIV-1 Env V4.2-Y712A-  
238 sfGFP when compared to the non-mutated clone (Fig. 6D-1). Four additional FRAP experiments  
239 were performed on virological synapses formed by HIV-V4.2-Y712A-sfGFP (Fig. 6D-2 to D-5).  
240 There was minimal or no recovery of Env or Gag observed over 5 minutes after photobleaching.  
241 Videos of all five virological synapses are in Supplemental Movies 7-11. Based on the extent of  
242 the fluorescence recovery the immobile fraction of Env was calculated, which was close to 100%  
243 in all the examples (Fig. 6E).

244

## 245 **Discussion**

246 In this study, we have constructed a fluorescent Env-carrying HIV clone that is capable of  
247 viral entry and productive infection in T cells in cell culture. The fluorescent Env fusion protein  
248 resembles wild type Env in its subcellular distribution and is very efficient in its ability to  
249 participate in VS formation and cell-to-cell infection. This is the first description of a HIV-1 clone  
250 encoding a fluorescent Env that is autonomously infectious. It enables live tracking of Env and

251 its exchange between subcellular compartments during its recruitment to the VS. This tool  
252 makes it possible to observe Env distribution and trafficking within the context of productive  
253 infections, and in the absence of helper virus. We employ it here to test models for how Env  
254 trafficking contributes to viral spread between cells and supports the production of infectious  
255 virus particles.

256 Immunofluorescence with monoclonal antibody, 2G12, which recognizes a carbohydrate  
257 epitope, revealed that the localization of V4.2 Env resembles native HIV-1 Env. With super-  
258 resolution imaging and surface Env staining, we observed that the majority of Env is expressed  
259 in internal compartments, the endoplasmic reticulum, the Golgi apparatus, and endosomal  
260 compartments. As previously appreciated, cell surface Env represents a small fraction of total  
261 Env in the cell, and the results of our fluorescence microscopy also show very low surface Env  
262 levels (41-43), which also appears to correlate with the low Env density on viral particles (7-14  
263 Env trimer/particle) (44, 45). When imaging VS, the fluorescent Env construct revealed  
264 increased concentrations of surface-targeted Env at cell-cell contact zones. This localization is  
265 consistent with the earliest VS imaging studies on fixed samples that indicate that Env  
266 accumulates to the VS area through actin dependent processes (3). In our study, cell surface  
267 Env that was not localized to the VS was only readily observed after amplification with  
268 fluorescent secondary antibodies. When visualized with GFP alone, V4.2 Env density at the cell  
269 surface was relatively sparse and evenly distributed, with no obvious areas where Env is pre-  
270 accumulated prior to VS formation (Fig.2 K-M and Fig.4 A).

271 The Env distribution before and after VS formation exhibits two different patterns diffuse versus  
272 focal. These patterns may represent different secretory pathways that can be polarized to traffic  
273 when cells are engaged in immunological synapses (46-48). The initial broad distribution of Env  
274 on the cell surface occurs prior to target cell engagement, and retargeting of the recycled Env to  
275 the VS appears to occur following CD4 engagement and may facilitate efficient particle

276 incorporation. Evidence of VS-targeted Env trafficking can be observed prior to accumulation of  
277 Gag at the VS. When an infected cell is attached to an uninfected target cell, Env accumulation  
278 can be observed within minutes after cell attachment (33).

279 To explore the relationship of Gag and Env during the formation of VSs, a dual-fluorescent  
280 virus carrying Gag-iCherry and Env-V4/V5-IsfGFP fusion proteins was studied. The dual  
281 fluorescent construct can also efficiently engage in cell-to-cell transfer of HIV-1. The ability to  
282 mediate cell-to-cell HIV transfer indicates that the CD4 binding sites of these constructs are fully  
283 functional, and signaling events prior to and during VS formation are intact. Using this  
284 construct, a surface labeled Env pulse-chase experiment indicated that the display of Env on  
285 cell surface is followed by internalization and subsequent concentration at the VS. In cases  
286 where an Env:CD4 dependent adhesion was formed between an infected and uninfected T cell,  
287 the labelled Env appeared to be directionally targeted to the cell-cell contact site with minimal  
288 signal observed away from the VS (Figure 4D). We suggest that Env functions initially as a cell-  
289 adhesion molecule and “detector” of target cell engagement, and then subsequently signaling  
290 from the cell-cell adhesion determines the site of polarized egress.

291 Early confocal imaging studies revealed the VS as a site where button-shaped  
292 accumulation of Gag formed at the adhesive junction between an infected cell and a target cell  
293 (34). Electron microscopy of the virological synapse revealed Gag accumulation in electron  
294 dense crescents forming a tight lattice at the VS (32, 34). Recruitment of Gag to the VS occurs  
295 from the lateral migration of plasma membrane-targeted Gag that moves towards the site of  
296 cell-cell contact site over minutes (34). FRAP studies here show that at a late stage of VS  
297 formation, after Gag synaptic button is established, Gag is largely immobile, and shows no  
298 recovery after photobleaching at the VS. This consistent with a largely irreversible incorporation  
299 of Gag into nascent budding particles (49). Compared to Gag, Env can also be observed at  
300 cell-cell contact area but at a lower relative concentration (Fig. 3F). A proposed model for Env

301 incorporation into a budding virus particle is that it may be mediated by “trapping” of Env with its  
302 long cytoplasmic tail becoming encumbered in the 2-dimensional Gag lattice (50). However, in  
303 contrast to Gag at the VS, which is not exchanging with other pools of Gag in the cell, a large  
304 majority of Env continues to exchange with intracellular pools even after stable VS formation.  
305 This ability to exchange freely may indicate that a large fraction of Env is incorporated after Gag  
306 crescent formation at a late stage of assembly, where it does not get encumbered by the  
307 budding Gag lattice. This could be consistent with a recent superresolution imaging study  
308 suggests that Env is packaged at a late-stage of assembly and is localized with a distribution  
309 biased toward the necks of budding viruses (51).

310 In our FRAP studies (Fig. 5), the majority of Env at the bleached area recovered within  
311 minutes of photobleaching with some minor differences in the final immobile fraction for Env.  
312 This indicates that while most Env is continuously recycling to the VS a relatively small, variable  
313 fraction can be immobilized at the VS. The state of the cell, the stage of VS formation and the  
314 size of the VS all may contribute to these differences in the immobile fraction. The biosynthesis  
315 of HIV Env and Gag occur through different pathways. In this paper, our FRAP studies indicate  
316 that the forces that maintain Gag and Env at the VS are distinct. They reveal that physically  
317 they are not part of a stable complex during VS formation. The high degree of recovery after  
318 FRAP also indicates that a majority of Env is not held in place at the VS by the interaction with  
319 CD4 on the target cell. The results also indicate that the interaction between Env and CD4 at  
320 VS is reversible and mediated by a state that does not yet trigger viral membrane fusion.

321 We characterized an endocytic Env mutant and performed FRAP at the VS and observed that  
322 Env could still accumulate at the VS, however, the recycling of Env to the VS was not observed.  
323 This shows that blocking the endocytosis of Env with a Y712A mutation abolishes the turnover  
324 of Env at the VS. In this case, the accumulation of Y712A Env at the VS may be driven by the  
325 high concentration of Env at the cell surface. Truncation mutants in the C-terminal tail of Env or

326 elimination of the main endocytic motif, Y712, allow high levels of Env to be displayed on cell  
327 surface (20, 24). An intact cytoplasmic tail is required for incorporation into the “neck” of the  
328 emerging budding virus and it is suggested that Env that are missing the CT are passively  
329 incorporated into viral particles (51). In our experiments, the Y712A endocytosis mutant leads to  
330 more viral transfer through the VS, though shows limited impact on the overall infectivity. This  
331 mutant can display different phenotypes depending upon the cell line it is tested in though in  
332 general it is still infectious (52). Together these data indicate that recycling is dispensable for  
333 VS formation, transfer and infection. We therefore speculate that a major role of recycling of  
334 Env at the VS lies in immune evasion: keeping surface Env density low to escape from immune  
335 surveillance (53) (54). Other studies from our group have shown Y712A mutants can also  
336 impact Env cell surface conformation and modulate the ability of broadly neutralizing  
337 monoclonal antibodies to neutralize cell-to-cell infection (55).

338 In summary these imaging studies support an emerging model of HIV-1 cell-to-cell infection,  
339 where Env traffics between the cell surface and the ERC before being packaged onto a budding  
340 virus particle (Fig. 7). An initial transient phase of exposure at the cell surface participates in the  
341 detection of the target cell. Subsequently Env that is recycled from surface to ERC, is  
342 redirected specifically to the VS, where Env is incorporated into virus. Dynamic trafficking of  
343 Env supports initial VS formation and enables VS to form under conditions where surface Env  
344 concentrations are maintained at very low levels. The process of recruitment to the VS is  
345 therefore optimized to reduce promote efficient transfer of virus from cell to cell while  
346 maintaining minimal surface expression of the dominant viral surface antigen.

347

348 **References:**

- 349 1. Owens RJ, Dubay JW, Hunter E, Compans RW. 1991. Human immunodeficiency  
350 virus envelope protein determines the site of virus release in polarized epithelial  
351 cells. *Proc Natl Acad Sci U S A* 88:3987-91.
- 352 2. Sattentau Q. 2008. Avoiding the void: cell-to-cell spread of human viruses. *Nat*  
353 *Rev Microbiol* 6:815-26.
- 354 3. Jolly C, Kashefi K, Hollinshead M, Sattentau QJ. 2004. HIV-1 cell to cell transfer  
355 across an Env-induced, actin-dependent synapse. *J Exp Med* 199:283-93.
- 356 4. Gheysen D, Jacobs E, de Foresta F, Thiriart C, Francotte M, Thines D, De Wilde  
357 M. 1989. Assembly and release of HIV-1 precursor Pr55gag virus-like particles  
358 from recombinant baculovirus-infected insect cells. *Cell* 59:103-12.
- 359 5. Qi M, Chu H, Chen X, Choi J, Wen X, Hammonds J, Ding L, Hunter E, Spearman  
360 P. 2015. A tyrosine-based motif in the HIV-1 envelope glycoprotein tail mediates  
361 cell-type- and Rab11-FIP1C-dependent incorporation into virions. *Proc Natl Acad*  
362 *Sci U S A* 112:7575-80.
- 363 6. Qi M, Williams JA, Chu H, Chen X, Wang JJ, Ding L, Akhirome E, Wen X,  
364 Lapierre LA, Goldenring JR, Spearman P. 2013. Rab11-FIP1C and Rab14 direct  
365 plasma membrane sorting and particle incorporation of the HIV-1 envelope  
366 glycoprotein complex. *PLoS Pathog* 9:e1003278.
- 367 7. Kirschman J, Qi M, Ding L, Hammonds J, Dienger-Stambaugh K, Wang JJ,  
368 Lapierre LA, Goldenring JR, Spearman P. 2017. HIV-1 Envelope Glycoprotein  
369 Trafficking through the Endosomal Recycling Compartment is Required for  
370 Particle Incorporation. *J Virol* doi:10.1128/JVI.01893-17.
- 371 8. Malbec M, Porrot F, Rua R, Horwitz J, Klein F, Halper-Stromberg A, Scheid JF,  
372 Eden C, Mouquet H, Nussenzweig MC, Schwartz O. 2013. Broadly neutralizing  
373 antibodies that inhibit HIV-1 cell to cell transmission. *J Exp Med* 210:2813-21.
- 374 9. Beliakova-Bethell N, Hezareh M, Wong JK, Strain MC, Lewinski MK, Richman  
375 DD, Spina CA. 2017. Relative efficacy of T cell stimuli as inducers of productive  
376 HIV-1 replication in latently infected CD4 lymphocytes from patients on  
377 suppressive cART. *Virology* 508:127-133.
- 378 10. Chen P, Hubner W, Spinelli MA, Chen BK. 2007. Predominant mode of human  
379 immunodeficiency virus transfer between T cells is mediated by sustained Env-  
380 dependent neutralization-resistant virological synapses. *J Virol* 81:12582-95.
- 381 11. Abela IA, Berlinger L, Schanz M, Reynell L, Gunthard HF, Rusert P, Trkola A.  
382 2012. Cell-cell transmission enables HIV-1 to evade inhibition by potent CD4bs  
383 directed antibodies. *PLoS Pathog* 8:e1002634.

- 384 12. Reh L, Magnus C, Schanz M, Weber J, Uhr T, Rusert P, Trkola A. 2015.  
385 Capacity of Broadly Neutralizing Antibodies to Inhibit HIV-1 Cell-Cell  
386 Transmission Is Strain- and Epitope-Dependent. *PLoS Pathog* 11:e1004966.
- 387 13. Checkley MA, Lutttge BG, Freed EO. 2011. HIV-1 envelope glycoprotein  
388 biosynthesis, trafficking, and incorporation. *J Mol Biol* 410:582-608.
- 389 14. Hallenberger S, Bosch V, Angliker H, Shaw E, Klenk HD, Garten W. 1992.  
390 Inhibition of furin-mediated cleavage activation of HIV-1 glycoprotein gp160.  
391 *Nature* 360:358-61.
- 392 15. Stein BS, Engleman EG. 1990. Intracellular processing of the gp160 HIV-1  
393 envelope precursor. Endoproteolytic cleavage occurs in a cis or medial  
394 compartment of the Golgi complex. *J Biol Chem* 265:2640-9.
- 395 16. Miranda LR, Schaefer BC, Kupfer A, Hu Z, Franzusoff A. 2002. Cell surface  
396 expression of the HIV-1 envelope glycoproteins is directed from intracellular  
397 CTLA-4-containing regulated secretory granules. *Proc Natl Acad Sci U S A*  
398 99:8031-6.
- 399 17. Byland R, Vance PJ, Hoxie JA, Marsh M. 2007. A conserved dileucine motif  
400 mediates clathrin and AP-2-dependent endocytosis of the HIV-1 envelope  
401 protein. *Mol Biol Cell* 18:414-25.
- 402 18. Rowell JF, Stanhope PE, Siliciano RF. 1995. Endocytosis of endogenously  
403 synthesized HIV-1 envelope protein. Mechanism and role in processing for  
404 association with class II MHC. *J Immunol* 155:473-88.
- 405 19. Wyss S, Berlioz-Torrent C, Boge M, Blot G, Honing S, Benarous R, Thali M.  
406 2001. The highly conserved C-terminal dileucine motif in the cytosolic domain of  
407 the human immunodeficiency virus type 1 envelope glycoprotein is critical for its  
408 association with the AP-1 clathrin adaptor [correction of adapter]. *J Virol* 75:2982-  
409 92.
- 410 20. Sauter MM, Pelchen-Matthews A, Bron R, Marsh M, LaBranche CC, Vance PJ,  
411 Romano J, Haggarty BS, Hart TK, Lee WM, Hoxie JA. 1996. An internalization  
412 signal in the simian immunodeficiency virus transmembrane protein cytoplasmic  
413 domain modulates expression of envelope glycoproteins on the cell surface. *J*  
414 *Cell Biol* 132:795-811.
- 415 21. Postler TS, Desrosiers RC. 2013. The tale of the long tail: the cytoplasmic  
416 domain of HIV-1 gp41. *J Virol* 87:2-15.
- 417 22. Boge M, Wyss S, Bonifacino JS, Thali M. 1998. A membrane-proximal tyrosine-  
418 based signal mediates internalization of the HIV-1 envelope glycoprotein via  
419 interaction with the AP-2 clathrin adaptor. *J Biol Chem* 273:15773-8.



- 420 23. Ohno H, Aguilar RC, Fournier MC, Hennecke S, Cosson P, Bonifacino JS. 1997.  
421 Interaction of endocytic signals from the HIV-1 envelope glycoprotein complex  
422 with members of the adaptor medium chain family. *Virology* 238:305-15.
- 423 24. LaBranche CC, Sauter MM, Haggarty BS, Vance PJ, Romano J, Hart TK,  
424 Bugelski PJ, Marsh M, Hoxie JA. 1995. A single amino acid change in the  
425 cytoplasmic domain of the simian immunodeficiency virus transmembrane  
426 molecule increases envelope glycoprotein expression on infected cells. *J Virol*  
427 69:5217-27.
- 428 25. Iwami S, Takeuchi JS, Nakaoka S, Mammano F, Clavel F, Inaba H, Kobayashi T,  
429 Misawa N, Aihara K, Koyanagi Y, Sato K. 2015. Cell-to-cell infection by HIV  
430 contributes over half of virus infection. *Elife* 4.
- 431 26. Law KM, Komarova NL, Yewdall AW, Lee RK, Herrera OL, Wodarz D, Chen BK.  
432 2016. In Vivo HIV-1 Cell-to-Cell Transmission Promotes Multicopy Micro-  
433 compartmentalized Infection. *Cell Rep* 15:2771-83.
- 434 27. Del Portillo A, Tripodi J, Najfeld V, Wodarz D, Levy DN, Chen BK. 2011.  
435 Multiploid inheritance of HIV-1 during cell-to-cell infection. *J Virol* 85:7169-76.
- 436 28. Levy DN, Aldrovandi GM, Kutsch O, Shaw GM. 2004. Dynamics of HIV-1  
437 recombination in its natural target cells. *Proc Natl Acad Sci U S A* 101:4204-9.
- 438 29. Gupta P, Balachandran R, Ho M, Enrico A, Rinaldo C. 1989. Cell-to-cell  
439 transmission of human immunodeficiency virus type 1 in the presence of  
440 azidothymidine and neutralizing antibody. *J Virol* 63:2361-5.
- 441 30. Sigal A, Kim JT, Balazs AB, Dekel E, Mayo A, Milo R, Baltimore D. 2011. Cell-to-  
442 cell spread of HIV permits ongoing replication despite antiretroviral therapy.  
443 *Nature* 477:95-8.
- 444 31. Dale BM, McNerney GP, Thompson DL, Hubner W, de Los Reyes K, Chuang  
445 FY, Huser T, Chen BK. Cell-to-cell transfer of HIV-1 via virological synapses  
446 leads to endosomal virion maturation that activates viral membrane fusion. *Cell*  
447 *Host Microbe* 10:551-62.
- 448 32. Wang L, Eng ET, Law K, Gordon RE, Rice WJ, Chen BK. 2017. Visualization of  
449 HIV T Cell Virological Synapses and Virus-Containing Compartments by Three-  
450 Dimensional Correlative Light and Electron Microscopy. *J Virol* 91.
- 451 33. Wang L, Izadmehr S, Kamau E, Kong XP, Chen BK. 2019. Sequential trafficking  
452 of Env and Gag to HIV-1 T cell virological synapses revealed by live imaging.  
453 *Retrovirology* 16:2.
- 454 34. Hubner W, McNerney GP, Chen P, Dale BM, Gordon RE, Chuang FY, Li XD,  
455 Asmuth DM, Huser T, Chen BK. 2009. Quantitative 3D video microscopy of HIV  
456 transfer across T cell virological synapses. *Science* 323:1743-7.

- 457 35. Ibraheem A, Campbell RE. 2010. Designs and applications of fluorescent  
458 protein-based biosensors. *Curr Opin Chem Biol* 14:30-6.
- 459 36. Nakane S, Iwamoto A, Matsuda Z. 2015. The V4 and V5 Variable Loops of HIV-1  
460 Envelope Glycoprotein Are Tolerant to Insertion of Green Fluorescent Protein  
461 and Are Useful Targets for Labeling. *J Biol Chem* 290:15279-91.
- 462 37. Durham ND, Chen BK. 2015. HIV-1 Cell-Free and Cell-to-Cell Infections Are  
463 Differentially Regulated by Distinct Determinants in the Env gp41 Cytoplasmic  
464 Tail. *J Virol* 89:9324-37.
- 465 38. Bhakta SJ, Shang L, Prince JL, Claiborne DT, Hunter E. 2011. Mutagenesis of  
466 tyrosine and di-leucine motifs in the HIV-1 envelope cytoplasmic domain results  
467 in a loss of Env-mediated fusion and infectivity. *Retrovirology* 8:37.
- 468 39. Pedelacq JD, Cabantous S, Tran T, Terwilliger TC, Waldo GS. 2006.  
469 Engineering and characterization of a superfolder green fluorescent protein. *Nat*  
470 *Biotechnol* 24:79-88.
- 471 40. Hubner W, Chen P, Del Portillo A, Liu Y, Gordon RE, Chen BK. 2007. Sequence  
472 of human immunodeficiency virus type 1 (HIV-1) Gag localization and  
473 oligomerization monitored with live confocal imaging of a replication-competent,  
474 fluorescently tagged HIV-1. *J Virol* 81:12596-607.
- 475 41. Marsh M, Pelchen-Matthews A, Hoxie JA. 1997. Roles for endocytosis in  
476 lentiviral replication. *Trends Cell Biol* 7:1-4.
- 477 42. Bowers K, Pelchen-Matthews A, Honing S, Vance PJ, Creary L, Haggarty BS,  
478 Romano J, Ballensiefen W, Hoxie JA, Marsh M. 2000. The simian  
479 immunodeficiency virus envelope glycoprotein contains multiple signals that  
480 regulate its cell surface expression and endocytosis. *Traffic* 1:661-74.
- 481 43. Berlioz-Torrent C, Shacklett BL, Erdtmann L, Delamarre L, Bouchaert I, Sonigo  
482 P, Dokhelar MC, Benarous R. 1999. Interactions of the cytoplasmic domains of  
483 human and simian retroviral transmembrane proteins with components of the  
484 clathrin adaptor complexes modulate intracellular and cell surface expression of  
485 envelope glycoproteins. *J Virol* 73:1350-61.
- 486 44. Zhu P, Liu J, Bess J, Jr., Chertova E, Lifson JD, Grise H, Ofek GA, Taylor KA,  
487 Roux KH. 2006. Distribution and three-dimensional structure of AIDS virus  
488 envelope spikes. *Nature* 441:847-52.
- 489 45. Zhu P, Chertova E, Bess J, Jr., Lifson JD, Arthur LO, Liu J, Taylor KA, Roux KH.  
490 2003. Electron tomography analysis of envelope glycoprotein trimers on HIV and  
491 simian immunodeficiency virus virions. *Proc Natl Acad Sci U S A* 100:15812-7.
- 492 46. Huse M, Lillemeier BF, Kuhns MS, Chen DS, Davis MM. 2006. T cells use two  
493 directionally distinct pathways for cytokine secretion. *Nat Immunol* 7:247-55.

- 494 47. Jolly C, Sattentau QJ. 2007. Regulated secretion from CD4+ T cells. *Trends*  
495 *Immunol* 28:474-81.
- 496 48. Finetti F, Onnis A, Baldari CT. 2015. Regulation of vesicular traffic at the T cell  
497 immune synapse: lessons from the primary cilium. *Traffic* 16:241-9.
- 498 49. Jouvenet N, Bieniasz PD, Simon SM. 2008. Imaging the biogenesis of individual  
499 HIV-1 virions in live cells. *Nature* 454:236-40.
- 500 50. Tedbury PR, Ablan SD, Freed EO. 2013. Global rescue of defects in HIV-1  
501 envelope glycoprotein incorporation: implications for matrix structure. *PLoS*  
502 *Pathog* 9:e1003739.
- 503 51. Buttler CA, Pezeshkian N, Fernandez MV, Aaron J, Norman S, Freed EO, van  
504 Engelenburg SB. 2018. Single molecule fate of HIV-1 envelope reveals late-  
505 stage viral lattice incorporation. *Nat Commun* 9:1861.
- 506 52. Day JR, Munk C, Guatelli JC. 2004. The membrane-proximal tyrosine-based  
507 sorting signal of human immunodeficiency virus type 1 gp41 is required for  
508 optimal viral infectivity. *J Virol* 78:1069-79.
- 509 53. von Bredow B, Arias JF, Heyer LN, Gardner MR, Farzan M, Rakasz EG, Evans  
510 DT. 2015. Envelope Glycoprotein Internalization Protects Human and Simian  
511 Immunodeficiency Virus-Infected Cells from Antibody-Dependent Cell-Mediated  
512 Cytotoxicity. *J Virol* 89:10648-55.
- 513 54. Egan MA, Carruth LM, Rowell JF, Yu X, Siliciano RF. 1996. Human  
514 immunodeficiency virus type 1 envelope protein endocytosis mediated by a  
515 highly conserved intrinsic internalization signal in the cytoplasmic domain of gp41  
516 is suppressed in the presence of the Pr55gag precursor protein. *J Virol* 70:6547-  
517 56.
- 518 55. Li H, Zony C, Chen P, Chen BK. 2017. Reduced Potency and Incomplete  
519 Neutralization of Broadly Neutralizing Antibodies against Cell-to-Cell  
520 Transmission of HIV-1 with Transmitted Founder Envs. *J Virol* 91.
- 521 56. Adachi A, Gendelman HE, Koenig S, Folks T, Willey R, Rabson A, Martin MA.  
522 1986. Production of acquired immunodeficiency syndrome-associated retrovirus  
523 in human and nonhuman cells transfected with an infectious molecular clone. *J*  
524 *Virol* 59:284-91.
- 525

526 **Figure legends**

527 **Figure 1. Construction of infectious HIV clones with fluorescent Env carrying sfGFP inserted**  
528 **into V4 or V5 domains of Env. (A)** sfGFP is inserted into HIV-1(NL4-3) in V4 or V5. **(B)** Virus  
529 production by fluorescent Env HIV constructs following transfection of 293T cells. **(C)** Cell-free  
530 virus infectivity was tested by infection of indicator cell line, Tzm-bl. Tzm-bl cells were infected  
531 with supernatants with same amount of p24. **(D)** Western blot analysis of lysates of transfected  
532 293T cells or of virus particles harvested from transfected cell supernatants and purified  
533 through a 20% sucrose cushion. Blots were probed with anti-gp120 or anti-GFP antibody. Viral  
534 supernatants and cell lysates were collected at 48 h post transfection. **(E)** Infection of Jurkat  
535 cells or MT4 cells with virus was assessed on day 3 after infection. **(F)** Infection of MT4 cells  
536 initiated by co-culture with HIV-nucleofected Jurkat T cells. FACS analysis was used to monitor  
537 the fraction of MT4 cells infected over time. **(G)** Infection of Jurkat cells initiated by co-culture  
538 with HIV-nucleofected Jurkat T cells. FACS analysis was used to monitor the fraction of Jurkat  
539 cells infected over time.

540 **Figure 2. Fluorescence microscopy showing cellular distribution of sfGFP-tagged Env in Jurkat**  
541 **cells. (A-D)** Confocal fluorescence microscopy imaging of Jurkat cells transfected with HIV Env  
542 V4.2-Gag-iCherry were fixed and stained with anti-Env mAb 2G12 (Magenta). **A**, V4.2 sfGFP Env  
543 localization, **B**, 2G12 Env immunostaining, **C**, Merged image, **D**, merged image with bright field  
544 overlay. **(E)** Graph shows the fluorescence intensity of Env and 2G12 staining traced along the  
545 line indicated in **(D)**. **(F-I)** Super resolution structured illumination imaging of Jurkat cell  
546 transfected with V4.2-Gag-iCherry were stained with cell mask Deep Red. **F**, Cherry-Gag; **G**,  
547 sfGFP-Env, **H**, Cell Mask; **I**, Merged image. **(J)** Graph shows the fluorescence intensity of Gag,

548 Env and plasma membrane along the line as indicated in (I). **(K-M)** Cell surface Env was stained  
549 with anti-GFP followed by secondary antibody while cells were alive at 4°C. The cells were then  
550 imaged for surface anti-GFP Env staining, K, single confocal plane; L, single plans merged with  
551 bright field; M, Z-projection of stack. **(N)** Confocal z stacks were acquired at 10-min intervals  
552 from 6 h post transfection for 20 h. Series of images show montage of fluorescence expression  
553 illustrating changes in the fluorescence pattern of Env-V4.2-sfGFP. **(O)** Env-sfGFP fluorescence is  
554 concentrated where two target cells make contact with a donor Jurkat cell. **(P)** is a bright field  
555 snap of **(O)**. **(Q)** shows Env accumulation at VS area between an infected primary CD4 T cell and  
556 a target primary CD4 T cell. Bar: 5 µm.

557 **Figure 3. Cell-to-cell HIV-1 transfer assays using dual fluorescent construct of V4/V5-Gag-**  
558 **iCherry. (A)** Dual fluorescent HIV-1 constructs produce viral particles in 293T cells as measured  
559 by p24 ELISA. **(B)** Infectivity of these dual fluorescent HIV-1 constructs using Tzm-bl assay shows  
560 infectivity of single fluorescent Env constructs and low infectivity of viruses carrying chimeric  
561 Gag-iCherry or Gag-iGFP. **(C)** Dual fluorescent constructs HIV-1 V4.2-Gag-iCherry participates in  
562 cell-to-cell transfer of HIV from Jurkat to primary CD4 T cells. Flow cytometry measures  
563 transfer of Gag-iCherry and Env V4.2-sfGFP signal following cell-cell co-culture, and the transfer  
564 is sensitive to CD4 antibody leu3a. **(D)** Cell-to-cell HIV-1 transfer of Gag and Env measured with  
565 indicated fluorescent HIV-1 constructs. **(E)** HIV-1 virological synapses between HIV V4.2-Gag-  
566 iCherry transfected Jurkat cells and primary CD4 T cells. Primary CD4 cells from healthy human  
567 blood were co-cultured with transfected donor cells for 3 h. upper panel: A typical synaptic  
568 button with both Gag and Env was shown between a donor Jurkat cell and a target cell. Lower  
569 panel: one donor cell nucleofected with V4.2-Gag-iCherry formed two virological synapses: the

570 lower synapse shows both Env and Gag concentrated at the cell-cell contact site, while the  
571 upper synapse shows Gag accumulation without Env accumulation. **(F)** Analysis of Env and Gag  
572 colocalization at virological synapses. Samples fixed at 1 hour post co-culture and 3 hours post  
573 co-culture were compared. Virological synapses defined by Gag at the site of cell-cell contact  
574 were counted if Env was visible at cell contact site. **(G)** Transfer of both Gag and Env into target  
575 cells. Co-cultured cells were fixed and observed by confocal microscopy. Inset shows partial  
576 colocalization of transferred Gag and Env. Green, red and yellow arrowheads show Env only,  
577 Gag only transfer or co-transfer of both Gag and Env. Bar: 5  $\mu\text{m}$ .

578 **Figure 4. Pulse-chase labeling of cell-surface Env shows that recycled Env is targeted to**  
579 **virological synapse.** **(A)** Live cell surface staining of V4.2-Gag-iCherry: nucleofected Jurkat cells  
580 stained with anti-GFP antibody at 4°C. **(B)** Pulse-chase of surface Env to determine time  
581 required for endocytosis: cells with surface stained Env were moved from 4°C to 37°C and kept  
582 for indicated time. The cells were fixed after incubation at 37°C and imaged. **(C)** The stained  
583 cells in **(A)** were immediately co-cultured with primary CD4 target cells for 30 min at 37 °C and  
584 fixed for imaging. **(D)** The stained cells in **(A)** were put in 37°C for 30 min first, then co-cultured  
585 with primary CD4 target cells for another 30 min at 37 °C and fixed for imaging. Arrowheads  
586 show virological synapses. Bar: 6  $\mu\text{m}$ .

587

588 **Figure 5. Rapid Env fluorescence recovery after photobleaching was observed at the VS.** **(A1)**  
589 Before photobleaching a virological synapse with both Gag and Env could be observed between  
590 a donor cell and a target cell. A region covering part of the synaptic button is bleached as

591 shown in the white square. After photobleaching, obvious fluorescent recovery was observed in  
592 Env, but not in Gag. ROIs were selected on bleached synapse or an unbleached area as shown in  
593 closed yellow region. A fluorescence intensity curve describing the fluorescence recovery is  
594 shown (left). Four additional representative cells repeating experiments with wild type V4.2-  
595 Gag-iCherry are displayed in (A2-A5). (B) shows the immobile fraction of each FRAP experiment.  
596 (C) shows the half recovery time of A1-A5. Bar: 3  $\mu$ m.

597 **Figure 6. Env fluorescence after photobleaching does not recover when examining Y712A**  
598 **mutants of V4.2-sfGFP in FRAP.** (A) Jurkat cells nucleofected with wild type Env-V4.2-sfGFP or  
599 Env-V4.2-Y712A-sfGFP were co-cultured with primary CD4 cells for 3 hours. Env transfer to  
600 primary CD4 cells were determined by Flow cytometry. (B) Jurkat cells nucleofected with wild  
601 type, Env-V4.2-sfGFP, or Env-V4.2-Y712A-sfGFP were co-cultured with activated primary CD4  
602 cells to monitor productive infection in target cells. Samples were collected on day 1, 3, 5, 7 to  
603 determine the portion of primary CD4 cells with fluorescent Env. (C) Jurkat cells nucleofected  
604 with wild type, Env-V4.2-sfGFP, or Env-V4.2-Y712A-sfGFP were co-cultured with MT4 cells for  
605 days to monitor productive infection in target cells. Samples were collected on day 1, 3, 5, 7 to  
606 determine the portion of MT4 cells with fluorescent Env. (D) Fluorescence recovery after  
607 photobleaching (FRAP) of Env and Gag virological synapse with V4.2-712A-Gag-iCherry. Before  
608 photobleaching a virological synapse, both Gag and Env are concentrated at the junction  
609 between a donor cell and a target cell. A region of interest covering part of the synaptic button  
610 was bleached as shown in white square. ROIs were selected on bleached synapse (ROI-1) or an  
611 unbleached area (ROI-2) as shown in closed yellow region. Recovery curves of five individual

612 experiments are displayed in (D1-D5). (E) shows the immobile fraction of each FRAP  
613 experiment. Bar: 5  $\mu$ m.

614 **Figure 7. Model of Env trafficking pathways that support Env accumulation at the VS.** (1) Env  
615 is transported to the cell surface following synthesis through the ER/Golgi pathways. (2)  
616 Clathrin-mediated endocytosis is initiated by recognition of the Env cytoplasmic tail by adapter  
617 protein complex, AP-2, which recognizes the membrane proximal tyrosine motif in Env. (3)  
618 Following internalization Env is recycled back to the cell surface, selectively trafficking to the VS  
619 where it can be incorporated into nascent virus particles. (4) Env at the VS continues to recycle  
620 while Gag does not exchange.

621  
622  
623  
624  
625

## 626 METHODS

### 627 KEY RESOURCES TABLE

| REAGENT or RESOURCE                                 | SOURCE                 | IDENTIFIER      |
|-----------------------------------------------------|------------------------|-----------------|
| <b>Antibodies</b>                                   |                        |                 |
| anti-p24 capture antibody                           | Aalto Bio Reagents     | Cat# D7320      |
| Alkaline phosphatase conjugated mouse anti-HIV p24  | Aalto Bio Reagents     | Cat# BC1071-AP  |
| anti-GFP rabbit serum                               | Invitrogen             | Cat# A6455      |
| anti-HIV Immune Globulin (HIVIG)                    | AIDS reagents          | Cat# 3957       |
| Anti-rabbit horseradish peroxidase conjugated 2' Ab | Jackson Immunoresearch | Cat#111-035-003 |
| Anti-human horseradish peroxidase conjugated 2' Ab  | Jackson Immunoresearch | Cat#709-035-149 |



|                                                      |                       |             |
|------------------------------------------------------|-----------------------|-------------|
| Leu3a (HIV-blocking anti-CD4 antibody)               | BD Biosciences        | Cat#340853  |
| 2G12                                                 | AIDS reagent          | Cat# 1476   |
| <b>Bacterial and Virus Strains</b>                   |                       |             |
| NL4-3                                                | (56)                  | N/A         |
| Gag-iGFP                                             | (40)                  | N/A         |
| Gag-iCherry                                          | (40)                  | N/A         |
| HIV-1 Env-V4.1-sfGFP                                 | This paper            | N/A         |
| HIV-1 Env-V4.2-sfGFP                                 | This paper            | N/A         |
| HIV-1 Env-V5.2-sfGFP                                 | This paper            | N/A         |
| HIV-1 Env-V5.3-sfGFP                                 | This paper            | N/A         |
| HIV-1 Env V4.1 sfGFP-Gag-iCherry                     | This paper            | N/A         |
| HIV-1 Env V4.2 sfGFP-Gag-iCherry                     | This paper            | N/A         |
| HIV-1 Env V5.2 sfGFP-Gag-iCherry                     | This paper            | N/A         |
| NL-sfGI                                              | (26)                  | N/A         |
| HIV-1 Env-V4.2-712A-sfGFP                            | This paper            | N/A         |
| HIV-1 V4.2-Y712A-Gag-iCherry                         | This paper            | N/A         |
| <b>Biological Samples</b>                            |                       |             |
| Human: PBMC (from peripheral blood)                  | New York Blood Center | N/A         |
| Human: primary CD4 T cells (from peripheral blood)   | New York Blood Center | N/A         |
| <b>Chemicals, Peptides, and Recombinant Proteins</b> |                       |             |
| Dulbecco's Modified Eagle Medium (DMEM)              | Gibco                 | 12491-015   |
| RPMI 1640                                            | Sigma-Aldrich         | R8758       |
| Penicillin-Streptomycin (10,000 U/mL)                | Sigma-Aldrich         | 15140122    |
| Fetal bovine serum (FBS)                             | Gibco                 | 10082147    |
| IL-2                                                 | Miltenyi              | 130-097-746 |
| PHA                                                  | MilliporeSigma        | 431784      |
| Polyjet transfection reagent                         | Signagen              | SL100688    |
| Phosphate buffered saline (PBS)                      | Gibco                 | 13151014    |

|                                                                                                |                        |              |
|------------------------------------------------------------------------------------------------|------------------------|--------------|
| TBST                                                                                           | Lab self-made          | N/A          |
| Empigen                                                                                        | Millipore              | 324690       |
| Sapphire Substrate                                                                             | Invitrogen             | T2210        |
| RIPA buffer                                                                                    | Alfa Aesar             | AAJ62885AE   |
| Protease inhibitor cocktail                                                                    | Abcam                  | Ab201119     |
| Non-fat dry milk                                                                               | Lab Scientific         | 732-291-1940 |
| Ficoll                                                                                         | Cytiva                 | 45001750     |
| Poly-L-lysine                                                                                  | Ted Pella, INC         | 18026        |
| Triton X-100                                                                                   | Sigma                  | 9002-93-1    |
| fibronectin                                                                                    | Corning                | CB40008      |
| DAPI mounting media                                                                            | Vectashield            | H-1200       |
| <b>Critical Commercial Assays</b>                                                              |                        |              |
| CD4 T cell isolation kit II                                                                    | Miltenyi Biotec        | 130-096-533  |
| Luciferase Assay System                                                                        | Promega                | E1501        |
| Super Signal West Femto Maximum Sensitivity Substrate                                          | Thermo Scientific      | 34095        |
| <b>Experimental Models: Cell Lines</b>                                                         |                        |              |
| Human: Jurkat E6-1 cells                                                                       | Arthur Weiss, ARRP     | N/A          |
| Human: MT4 cells                                                                               | Douglass Richman, ARRP | N/A          |
| Human: 293T cells                                                                              | ATCC                   | CRL-3216     |
| Oligonucleotides                                                                               |                        |              |
| <b>P1 SFGFP : <u>AGCGGCGGAGGCGGAATGGTGAGCAA</u><br/>GGGCGAGGAGCT</b>                           | Eurofins genomics      | N/A          |
| <b>P2 SFGFP : <u>GCTGCCTCCACCTCCCTTGTACAGCT</u><br/>CGTCCATGCCG</b>                            | Eurofins genomics      | N/A          |
| <b>P3V4 . 1 : <u>CTTGCTCACCATTCCGCTCCGCCGCT</u><br/>CCCTTCAGTACTCCAAGTACTATT</b>               | Eurofins genomics      | N/A          |
| <b>P4V4 . 1 : <u>GGACGAGCTGTACAAGGGAGGTGGAGG</u><br/><u>CAGCTCAAATAACACTGAAGGA</u>agtgacac</b> | Eurofins genomics      | N/A          |
| <b>P3V4 . 2 : <u>CTTGCTCACCATTCCGCTCCGCCGCT</u><br/>ATTTGACCCCTTCAGTACTCCAAG</b>               | Eurofins genomics      | N/A          |

|                                                                              |                   |                      |
|------------------------------------------------------------------------------|-------------------|----------------------|
| <b>P4V4 . 2 : GGACGAGCTGTACAAGGGAGGTGGAGG<br/>CAGCAACTGAAGGAAGTGACacaatc</b> | Eurofins genomics | N/A                  |
| <b>P3V5 . 2 : CTTGCTCACCATTCCGCCTCCGCCGCT<br/>GTTGTTATTACCACCATCTCTTGT</b>   | Eurofins genomics | N/A                  |
| <b>P4V5 . 2 : GGACGAGCTGTACAAGGGAGGTGGAGG<br/>CAGCAATGGGTCCGAGATCTTC</b>     | Eurofins genomics | N/A                  |
| <b>P3V5 . 3 : CTTGCTCACCATTCCGCCTCCGCCGCT<br/>ATTGTTGTTATTACCACCATCTCTtg</b> | Eurofins genomics | N/A                  |
| <b>P4V5 . 3 : GGACGAGCTGTACAAGGGAGGTGGAGG<br/>CAGCGGGTCCGAGATCTTCAGA</b>     | Eurofins genomics | N/A                  |
| <b>P5NheI : aTAGCTAGCAAATTAAGAGAACAATTT<br/>GGA</b>                          | Eurofins genomics | N/A                  |
| <b>P6BamHI : taaGGATCCGTTCACTAATCGAATGG<br/>ATCT</b>                         | Eurofins genomics | N/A                  |
| <b>Software and Algorithms</b>                                               |                   |                      |
| Prism                                                                        | Graphpad software | Version 8            |
| Volocity                                                                     | Perkin Elmer      | Volocity 6.3         |
| Image J                                                                      | NIH               | Imagej.net           |
| Metamorph                                                                    | Molecular Devices | Moleculardevices.com |
| Imaris                                                                       | bitmap            | Imaris.oxinst.com    |
| FlowJo                                                                       | BD Biosciences    | www.flowjo.com       |
| SoftWoRx                                                                     | Amersham          | Version 7.0.0        |
| <b>Other</b>                                                                 |                   |                      |
| $\mu$ -Slide VI <sup>0.4</sup>                                               | ibidi             | Cat#80606            |

628

629 **CONTACT FOR REAGENT AND RESOURCE SHARING**

630 Further information and requests for resources and reagents should be directed to and will be  
631 fulfilled by the Lead Contact, Benjamin K. Chen (benjamin.chen@mssm.edu).  
632 Distribution of fluorescent Env HIV lab strains will require signing Material Transfer Agreement  
633 (MTA) in accordance with policies of Mount Sinai Medical Center.

## 634 **EXPERIMENTAL MODEL AND SUBJECT DETAILS**

### 635 **Cell lines**

636 The CD4<sup>+</sup> T-cell line Jurkat CE6.1 (ATCC) and CD4<sup>+</sup> T-cell line MT4 were maintained in RPMI  
637 1640 with 100 U/ml penicillin, 100 U/ml streptomycin and 10% fetal bovine serum (FBS). Cells  
638 were maintained at concentrations of less than 10<sup>6</sup>/ml. Primary CD4<sup>+</sup> T cells were obtained from  
639 human peripheral blood from deidentified HIV-negative blood donors, through the New York  
640 Blood Center and CD4<sup>+</sup> cells isolated by negative selection with a Miltenyi CD4 T cell isolation  
641 kit II (Miltenyi Biotec). Cell-free virus was produced by transfection of 293T cells in 10 cm plates  
642 using polyjet (Signagen). Media was exchanged 16h post transfection and virus supernatants  
643 were harvested 48h post transfection.

### 644 **Human primary CD4 T cells**

645 Human primary CD4<sup>+</sup> T cells are obtained from peripheral blood with CD4 T cell isolation kit II  
646 (Miltenyi Biotec). Unactivated CD4<sup>+</sup> T cells were maintained in complete RPMI medium  
647 containing 50 U/ml interleukin 2 (IL-2; ARP). Activated primary CD4<sup>+</sup> cells were induced by co-  
648 culture with irradiated PBMC feeder cells plus 100 U/ml IL-2 and 4 µg/ml PHA for 3 days.

### 649 **Viruses**

650 HIV Gag-iGFP and HIV Gag-iCherry are full-length molecular clones of HIV based on NL4-3  
651 (Adachi et al.) previously designed to carry the green fluorescent protein (GFP) or mCherry  
652 protein inserted between the Gag MA and CA domains (40). HIV constructs with fluorescent  
653 Env were constructed by inserting Superfolder green fluorescent protein (sfGFP) internally into  
654 the Env V4 or V5 domains, designated HIV Env- HIV V4.1-sfGFP, HIV Env-V4.2-sfGFP, HIV  
655 Env-V5.2-sfGFP or HIV Env-V5.3-sfGFP. The superfolder GFP is introduced by 2-step PCR  
656 with the primers shown in key resource table. These fluorescent Env genes are also inserted

657 into the context of HIV Gag-iCherry to yield constructs carrying Gag-iCherry and Env-sfGFP in  
658 cis. Y712A mutant was introduced by site mutation primer shown in key resource table.

659

## 660 **METHOD DETAILS**

### 661 **p24 ELISA**

662 Costar 3922 flat-bottomed, high binding plates were coated with anti-p24 capture antibody  
663 overnight (Aalto D7320; 1:200 in 0.1M NaHCO<sub>3</sub>). Plate was washed twice with 1x TBST and  
664 blocked with 2% nonfat dry milk (Lab Scientific) for 1h then washed in TBST. HIV supernatants  
665 treated with 1% Empigen (1:100 and 1:1,000 in DMEM) along with titration of p24 standard are  
666 added to wells and incubated at room temperature for 2 hours, then washed 4x with TBST.  
667 Alkaline phosphatase conjugated mouse anti-HIV p24 (CLINIQA) was added (1:8,000 in TBST  
668 20% sheep serum) and incubated for 1 hr followed by 6 TBST washes. 50 $\mu$ l of Sapphire  
669 Substrate (Tropix) was added to each well and incubated for 20 minutes. Luminescence was  
670 quantitated on Fluo Star Optima plate reader and sample values calculated based on nonlinear  
671 regression of standard curve using Prism software (Graphpad Inc.).

### 672 **Western Blot Analysis**

673 Cells or virus were lysed with RIPA buffer and protease inhibitor cocktail (Sigma). Protein  
674 loaded from viral lysates were normalized to p24 antigen content. Lysate equivalent of  
675 approximately  $2 \times 10^5$  cells per well were run on NuPage 4-12% Bis-Tris Gel (Novex) and  
676 transferred to Amersham Hybond-P PVDF membranes (GE Healthcare). Membranes were  
677 blocked with 2% nonfat dry milk (Lab Scientific), then probed with rabbit anti-GFP serum  
678 (1:5,000) or human anti-HIV serum (1:10,000) primary antibodies followed by anti-rabbit

679 (Jackson ImmunoResearch) or anti-human horseradish peroxidase (Jackson ImmunoResearch)  
680 conjugated secondary antibody. Detection of band is using Super Signal West Femto Maximum  
681 Sensitivity Substrate (Thermo Scientific).

#### 682 **TZM-bl assay**

683 Cell-free viruses were produced in 293T cells. TZM-bl cells were plated at  $2 \times 10^4$  cells/well in 96-  
684 well plates and incubated at 37°C with indicated viruses. Media was replaced after 24h of  
685 infection and incubated for another 24h. At 48h post infection, Media was aspirated followed by  
686 lysis in Luciferase Cell Culture Lysis Reagent (Promega). 20 $\mu$ l of each sample was read on Fluo  
687 Star Optima plate reader with injection of 50  $\mu$ l of Luciferase Assay Reagent (Promega).

#### 688 **Cell-to-cell transfer assay**

689 HIV-1 proviral constructs were transduced into Jurkat cells (donor cells) using Amaxa  
690 nucleofection as previously described (Amaxa Biosystems). In brief, 5  $\mu$ g of endotoxin-free HIV-  
691 1 proviral plasmids was nucleofected into  $6 \times 10^6$  Jurkat cells using Cell Line Nucleofector kit V,  
692 program S-18. Twenty hours after nucleofection, viable Jurkat cells were purified by  
693 centrifugation on a Ficoll-Hypaque density gradient, washed with complete buffer, and  
694 recovered at 37°C for co-culture. Unactivated primary CD4+ T cells (target cells) were cultured  
695 overnight in complete RPMI medium containing 50 U/ml IL-2. Donor and target cells were mixed  
696 at a ratio of approximately 1:1 and cocultured at 37°C for 3 h before they were treated with  
697 trypsin and fixed. Where inhibitor Leu3a, an HIV-blocking anti-CD4 antibody (BD Biosciences)  
698 was used, donor and target cells were preincubated separately with equal volumes of inhibitor  
699 for 30 min at 37°C before mixing.

#### 700 **Fluorescence microscopy sample preparation**

701 Transfected Jurkat cells (donor cells) were mixed with primary CD4 cells (target cells) in round  
702 bottom 96-well-plates for 3-4 hours as previously described. Trim the pipette tips to reduce the  
703 shearing to cells. Co-cultured donor and target cells were carefully transferred without  
704 disturbance onto poly-lysine treated coverslips. The cells were plated onto the poly-L-lysine  
705 treated coverslip for 30 min in 37°C incubator. Media was removed and cells fixed with 4% PFA  
706 for 10 min at room temperature, washed twice with PBS, and mounted with anti-fade mounting  
707 medium with DAPI (Vectashield, Co#: H-1200, Vector Laboratories). For intracellular staining of  
708 Env with 2G12, transfected Jurkat cells were plated onto poly-L-lysine treated cover glass and  
709 allowed to attach for 30 min at 37°C. The cells were permeabilized with PBS containing 0.1%  
710 triton X-100 and 2% FBS for 5 minutes. Next the cells were stained with 2G12 (1:200) for 1 hour  
711 followed by secondary antibody for 45 minutes. After washing, the samples were sealed in  
712 mounting media and ready to observe. For surface staining of Env, the cells were directly  
713 stained at 4°C with anti-GFP antibody (1:500) diluted in PBS with 2% FBS for 45 min, followed  
714 by a secondary antibody for 30 min, and then washed and fixed in 4% PFA or kept alive for live  
715 cell pulse-chase experiments.

## 716 **Confocal and live imaging**

717 Confocal imaging was carried out on an inverted Leica SP5 DMI laser scanning confocal  
718 microscope, using a 63× objective and analyzed using Volocity (PerkinElmer) or ImageJ (NIH)  
719 software. Live imaging was carried out in a sealed, gas permeable microchamber slides (Ibidi  
720 Biosciences). Donor cells were mixed with target cells at a ratio of 1:2 and were loaded onto the  
721 micro-chamber pre-coated with 150g/ml fibronectin to provide the cells with a two- dimensional  
722 substrate for attachment and migration. The chamber was placed on a Zeiss AxioObserver Z1  
723 inverted microscope mounted with Yokogawa CSU-X1 spinning disk scan head. Dual  
724 Hamamatsu EM-CCD C9100 digital cameras enable simultaneous imaging of up to two

725 fluorescent channels. Phase contrast imaging and confocal green (for sfGFP) and red (for  
726 mCherry) fluorescence were acquired in a multitrack configuration to avoid cross-talk between  
727 fluorescence channels. Images were recorded at different time intervals continuously as  
728 indicated in results. Confocal images and Quicktime movies were generated from laser-  
729 scanning confocal microscope file data using using Metamorph software (Molecular Devices)  
730 and Imaris (bitmap) software.

### 731 **Fluorescence Recovery after Photobleaching (FRAP)**

732 FRAP was performed on two systems: Zeiss LSM880 and Leica SP5 DMI. Zeiss LSM880  
733 Airyscan microscope equipped with a 63X oil-immersion objective (NA 1.4) using the 561 nm  
734 and 488 nm laser lines. The system is adjusted to proper humidity, 5% CO<sub>2</sub> and 37°C. The  
735 FRAP experiment on LSM880 used a 4-minute protocol: pre-bleach for 3 sec, bleach for 1 sec  
736 at 60% laser power and recovery of fluorescence was captured for the last of the 4 minutes. On  
737 Leica SP5 DMI, we used a 60X oil-immersion objective (NA1.4) with 561 nm and 488 nm laser  
738 lines. There is an inherent three-step capturing protocol from the system. After 1s bleaching, the  
739 first 100 frames were captured continuously; the second 50 frames were at 1s/frame and the  
740 last 50 frames at 5s/frame. A rectangular zone covering about half of the virological synapse  
741 was bleached, leaving the other half as unbleached area control and localization reference. In  
742 one case, where the virological synapse was too small to bleach a fraction of it, a nearby area  
743 was selected as unbleached area control. FRAP curve of the bleached virological synapse was  
744 determined from ROI rigidly covering the synapse button. A normal bleaching curve was  
745 determined from a different area covering most of the cytoplasm of the same cell and used for  
746 normalization of values. Fluorescence intensity over time was plotted using GraphPad Prism  
747 software, and the data were fitted to a one-phase exponential association function to calculate  
748 recovery half-times and immobile fractions.



749 **Super-resolution optical microscopy of HIV-infected T cells**

750 3D structured illumination microscopy of fixed T cells cells was performed with a commercial  
751 Deltavision OMXv4.0 BLAZE microscope (GE Healthcare, Amersham, UK) using a 60x, 1.42  
752 NA oil immersion PlanApoN objective lens (Olympus, Japan) and sCMOS cameras. Env tagged  
753 with sfGFP was excited at 488 nm and the emission recorded at 504–552 nm. Gag tagged with  
754 mCherry was excited at 546 nm and the emission recorded at 600-650 nm. The plasma  
755 membrane was stained with CellMask Deep Red, excited at 649 nm and the emission recorded  
756 at 660-670 nm. The nucleus was stained with DAPI, excited at 405 nm and the emission  
757 recorded at 450-470 nm. A sequence of 15 images for each axial plane, obtained at three  
758 different angles with five phases each, was acquired. Multiple axial planes encompassing the  
759 entire cell from top to bottom were recorded at a separation of the individual axial planes of 125  
760 nm. Super-resolved fluorescent images were reconstructed with the corresponding recorded  
761 optical transfer function (OTF) in the SoftWoRx 7.0.0 software (GE Healthcare, Amersham, UK)  
762 at a Wiener filter setting of 0.006.

763 **DATA AND SOFTWARE AVAILABILITY**

764 Primary imaging data are available upon request.

765

## Figure 1

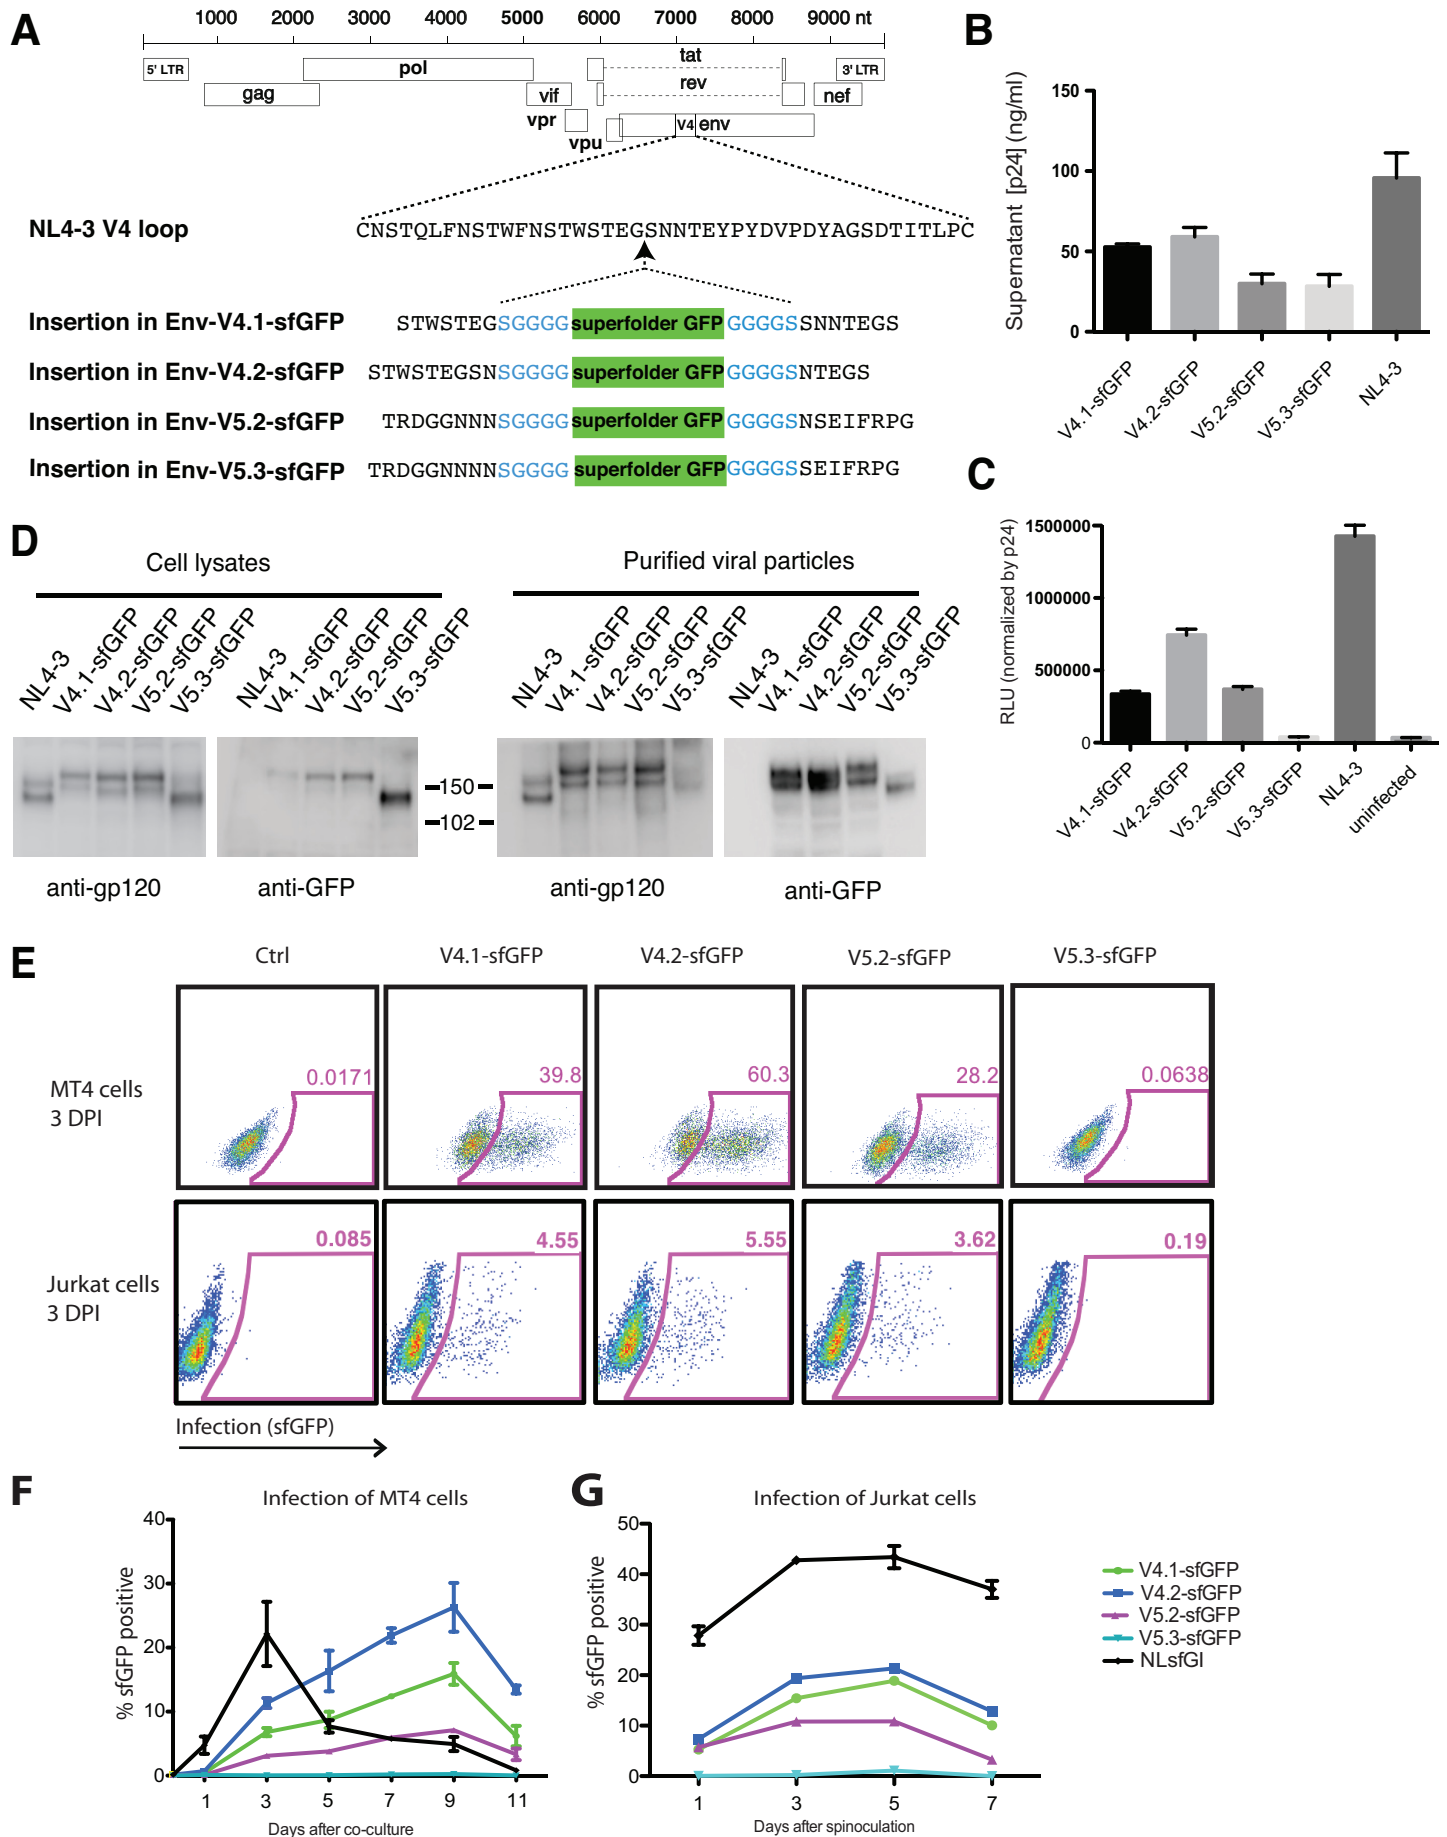

## Figure 2

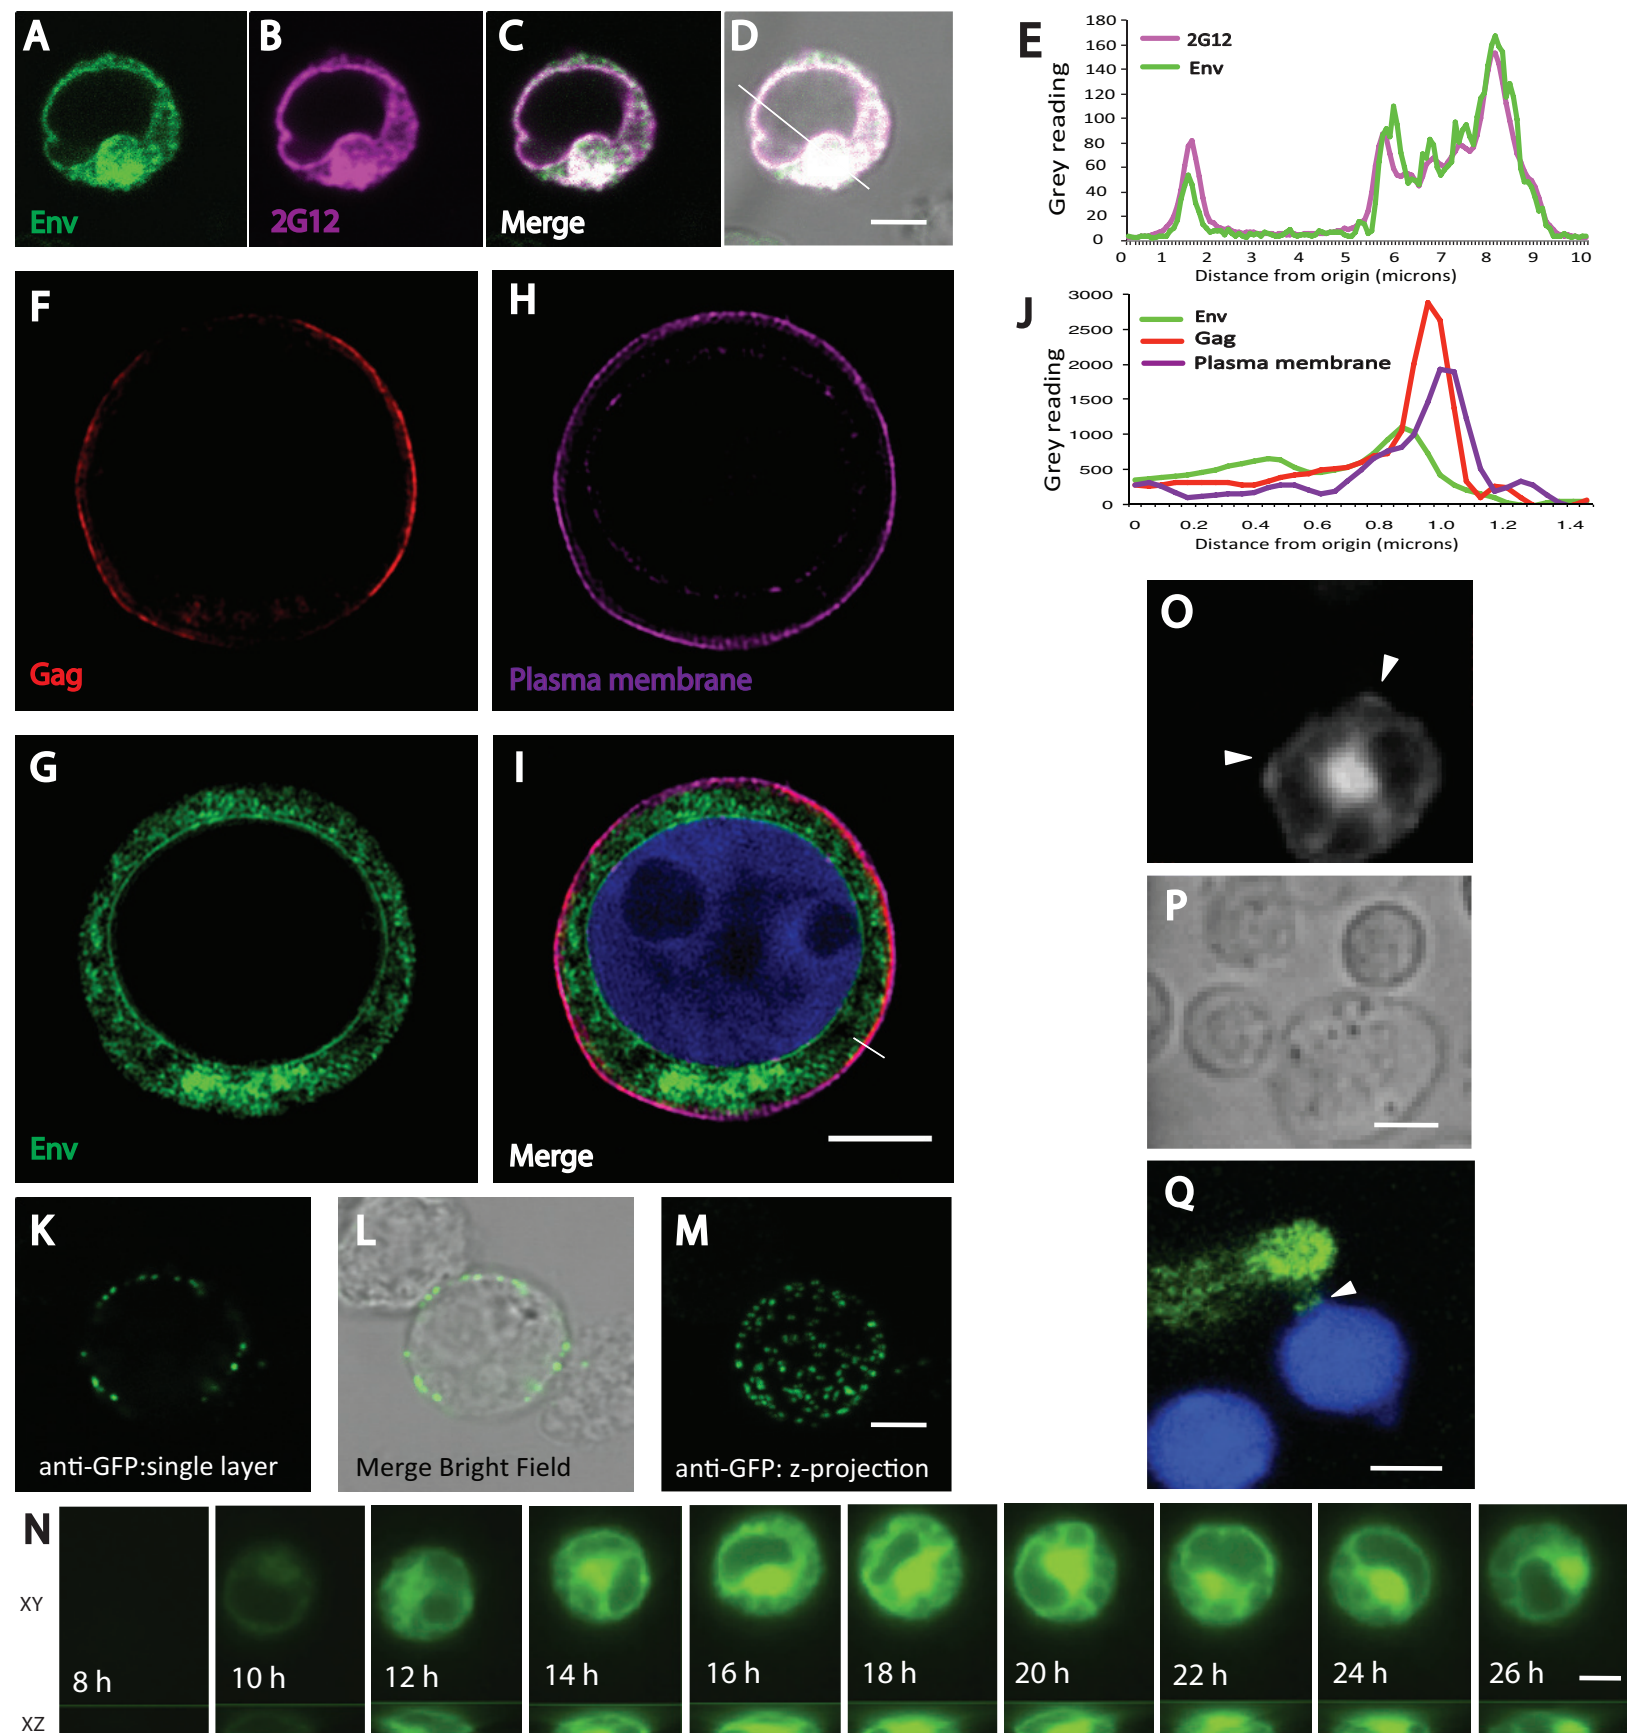

Figure 3

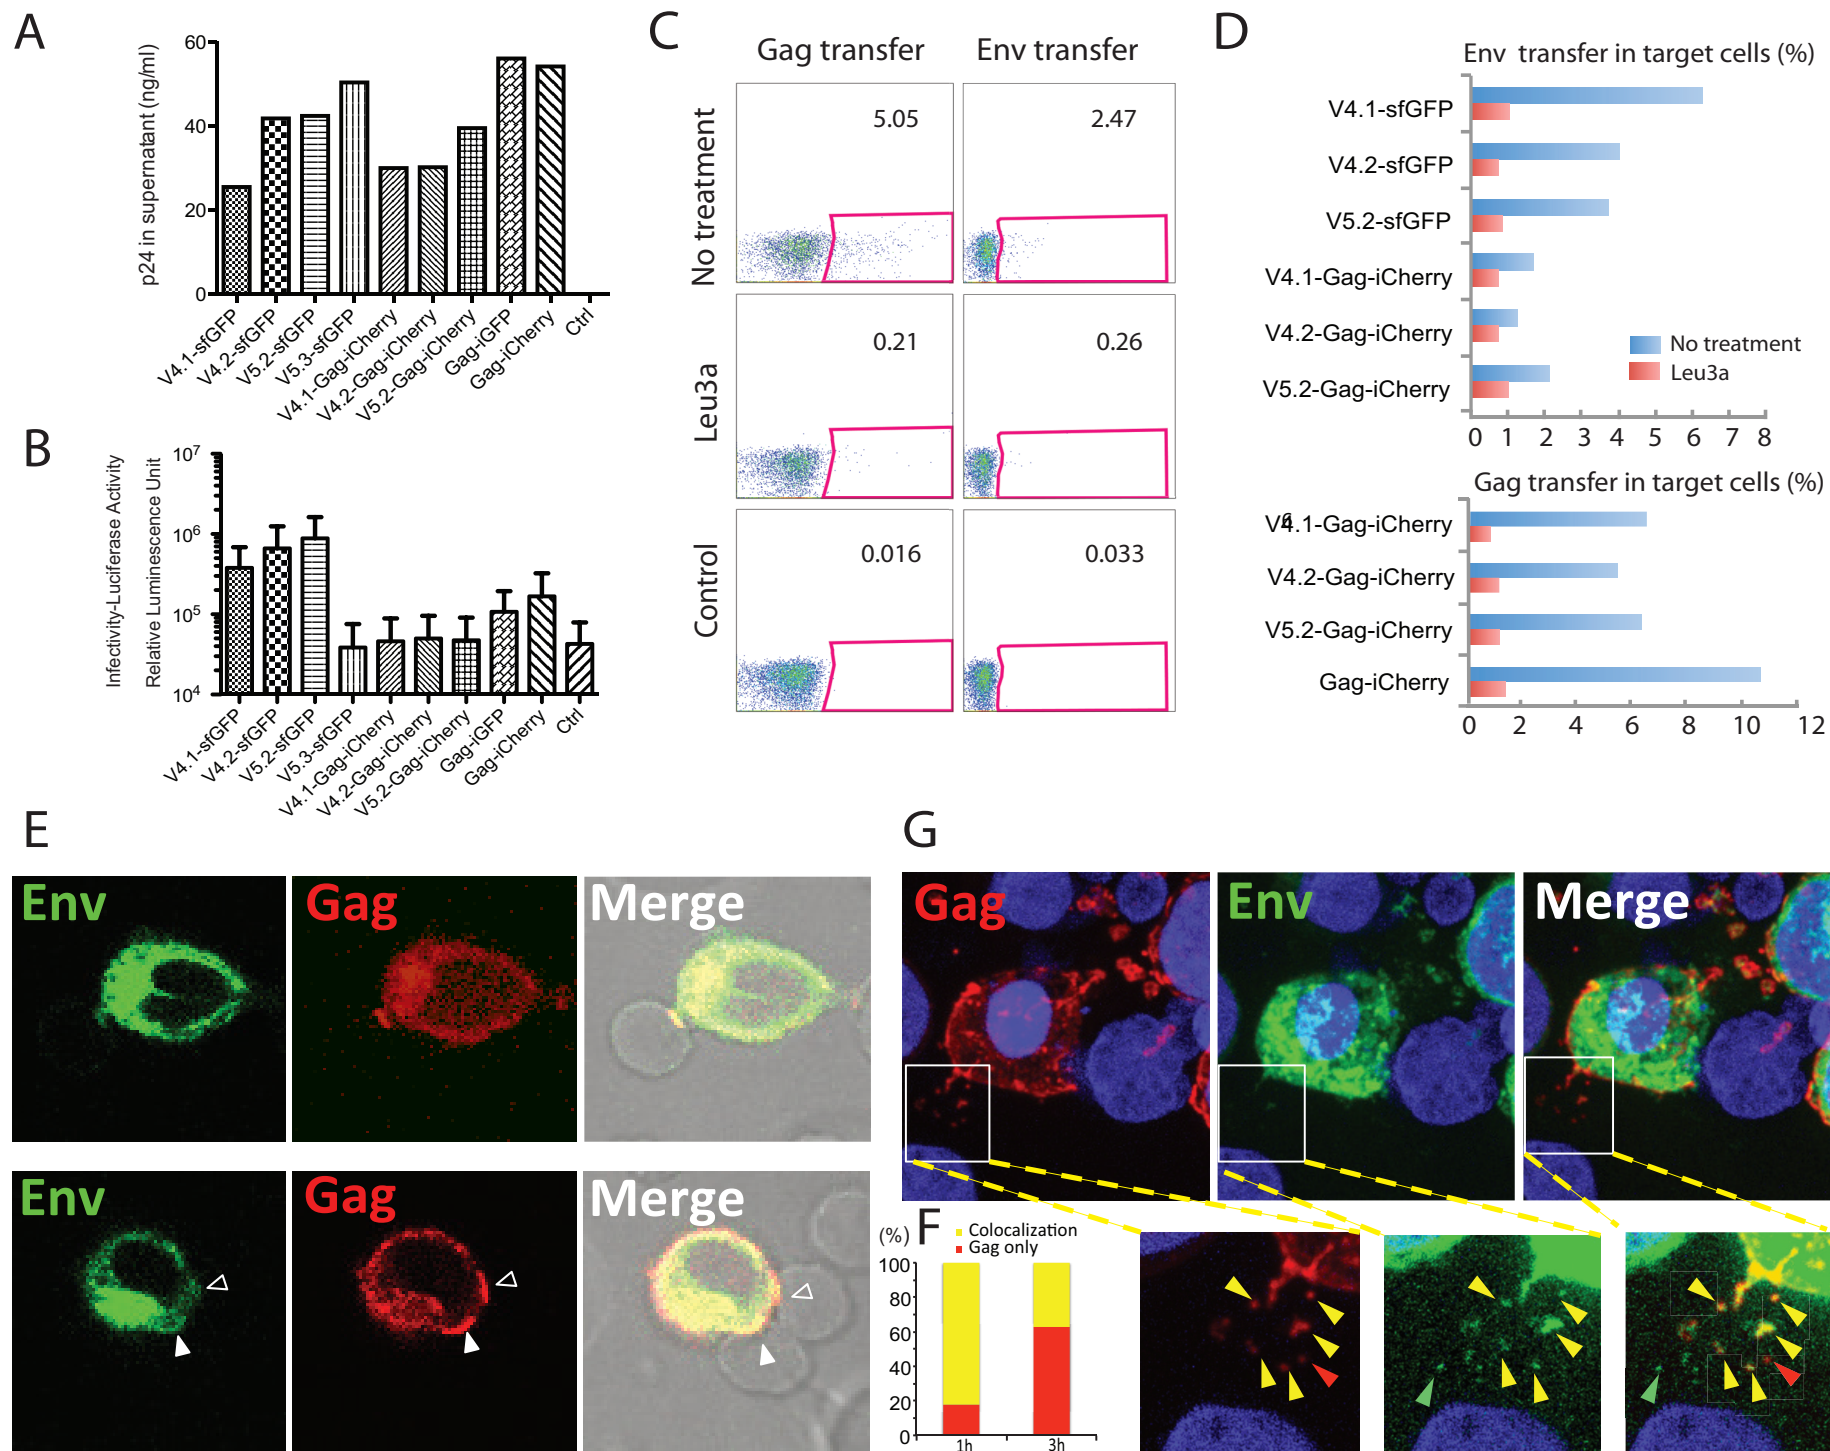

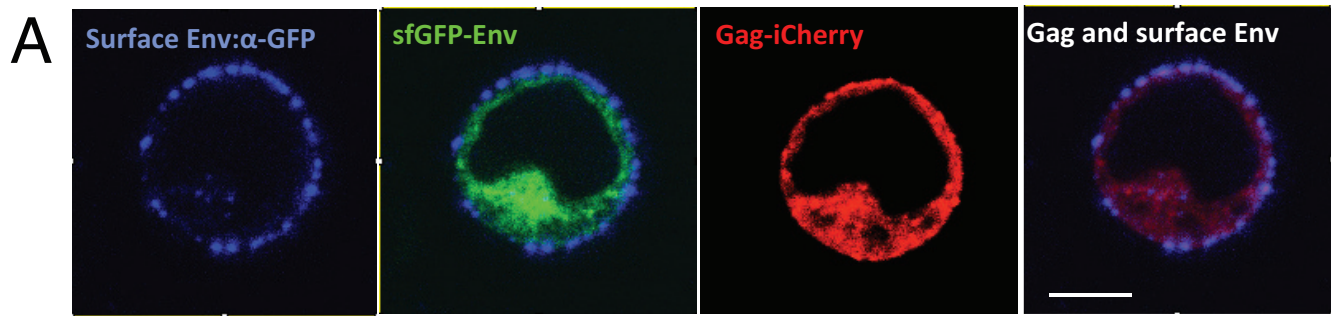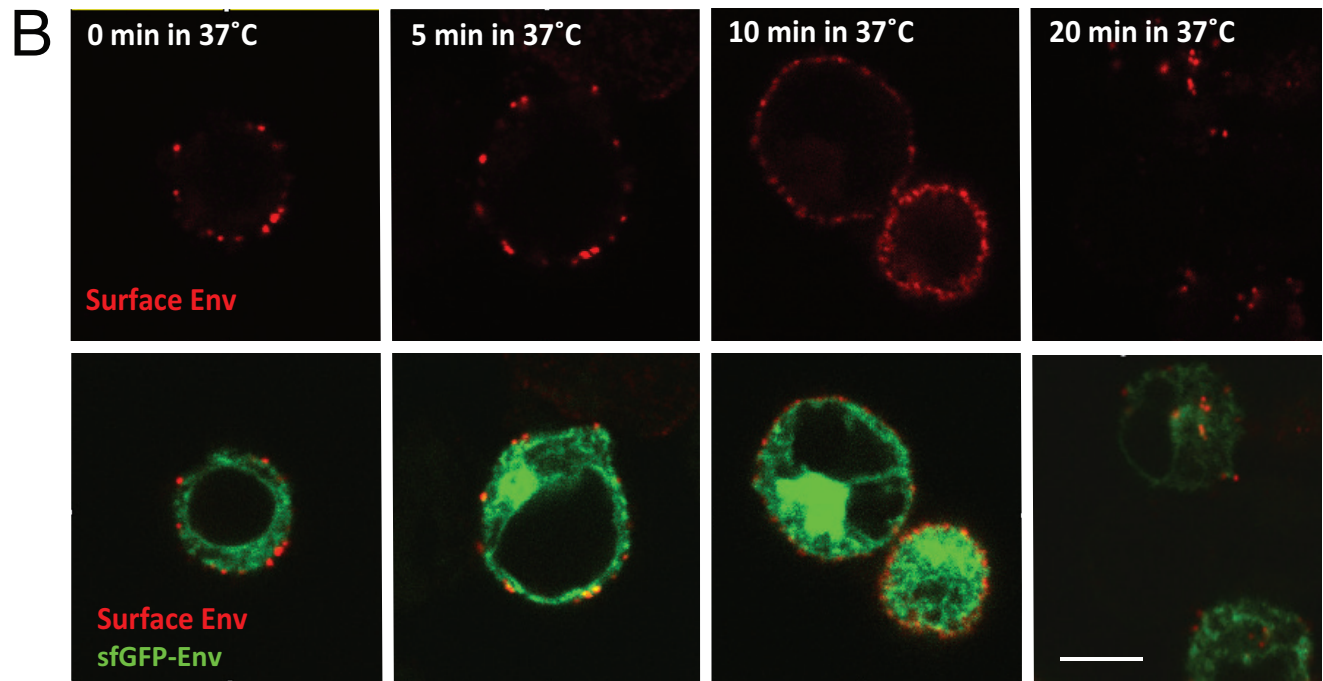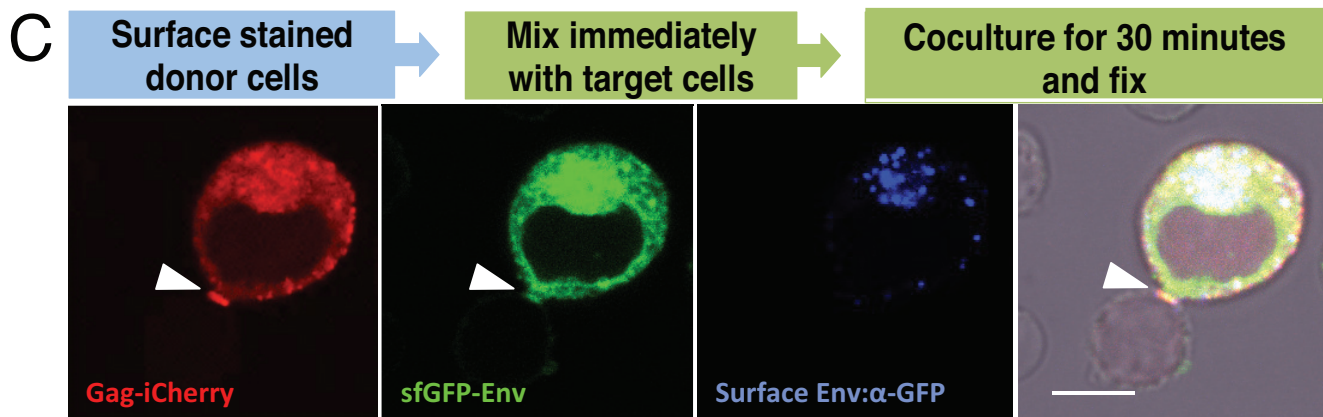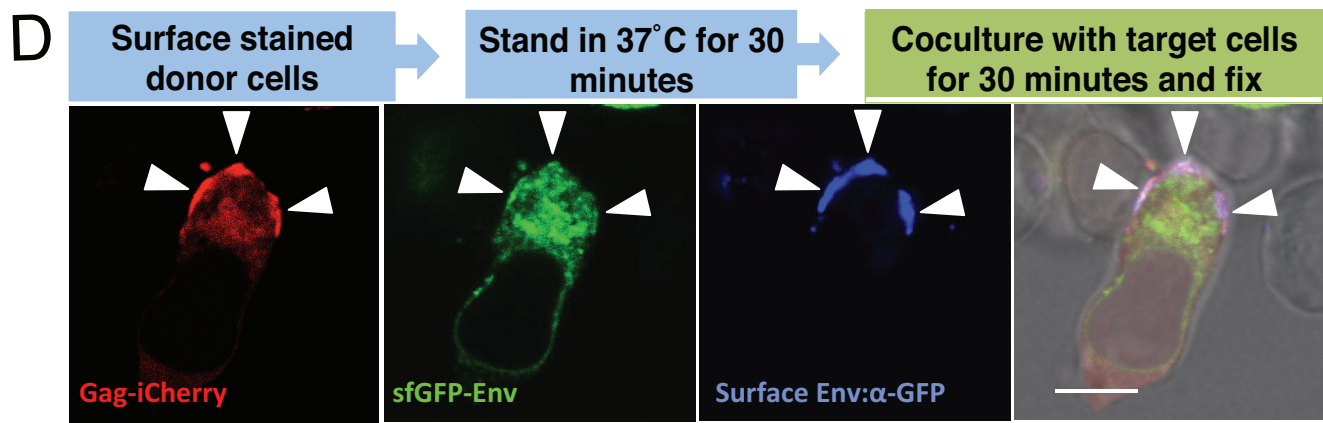

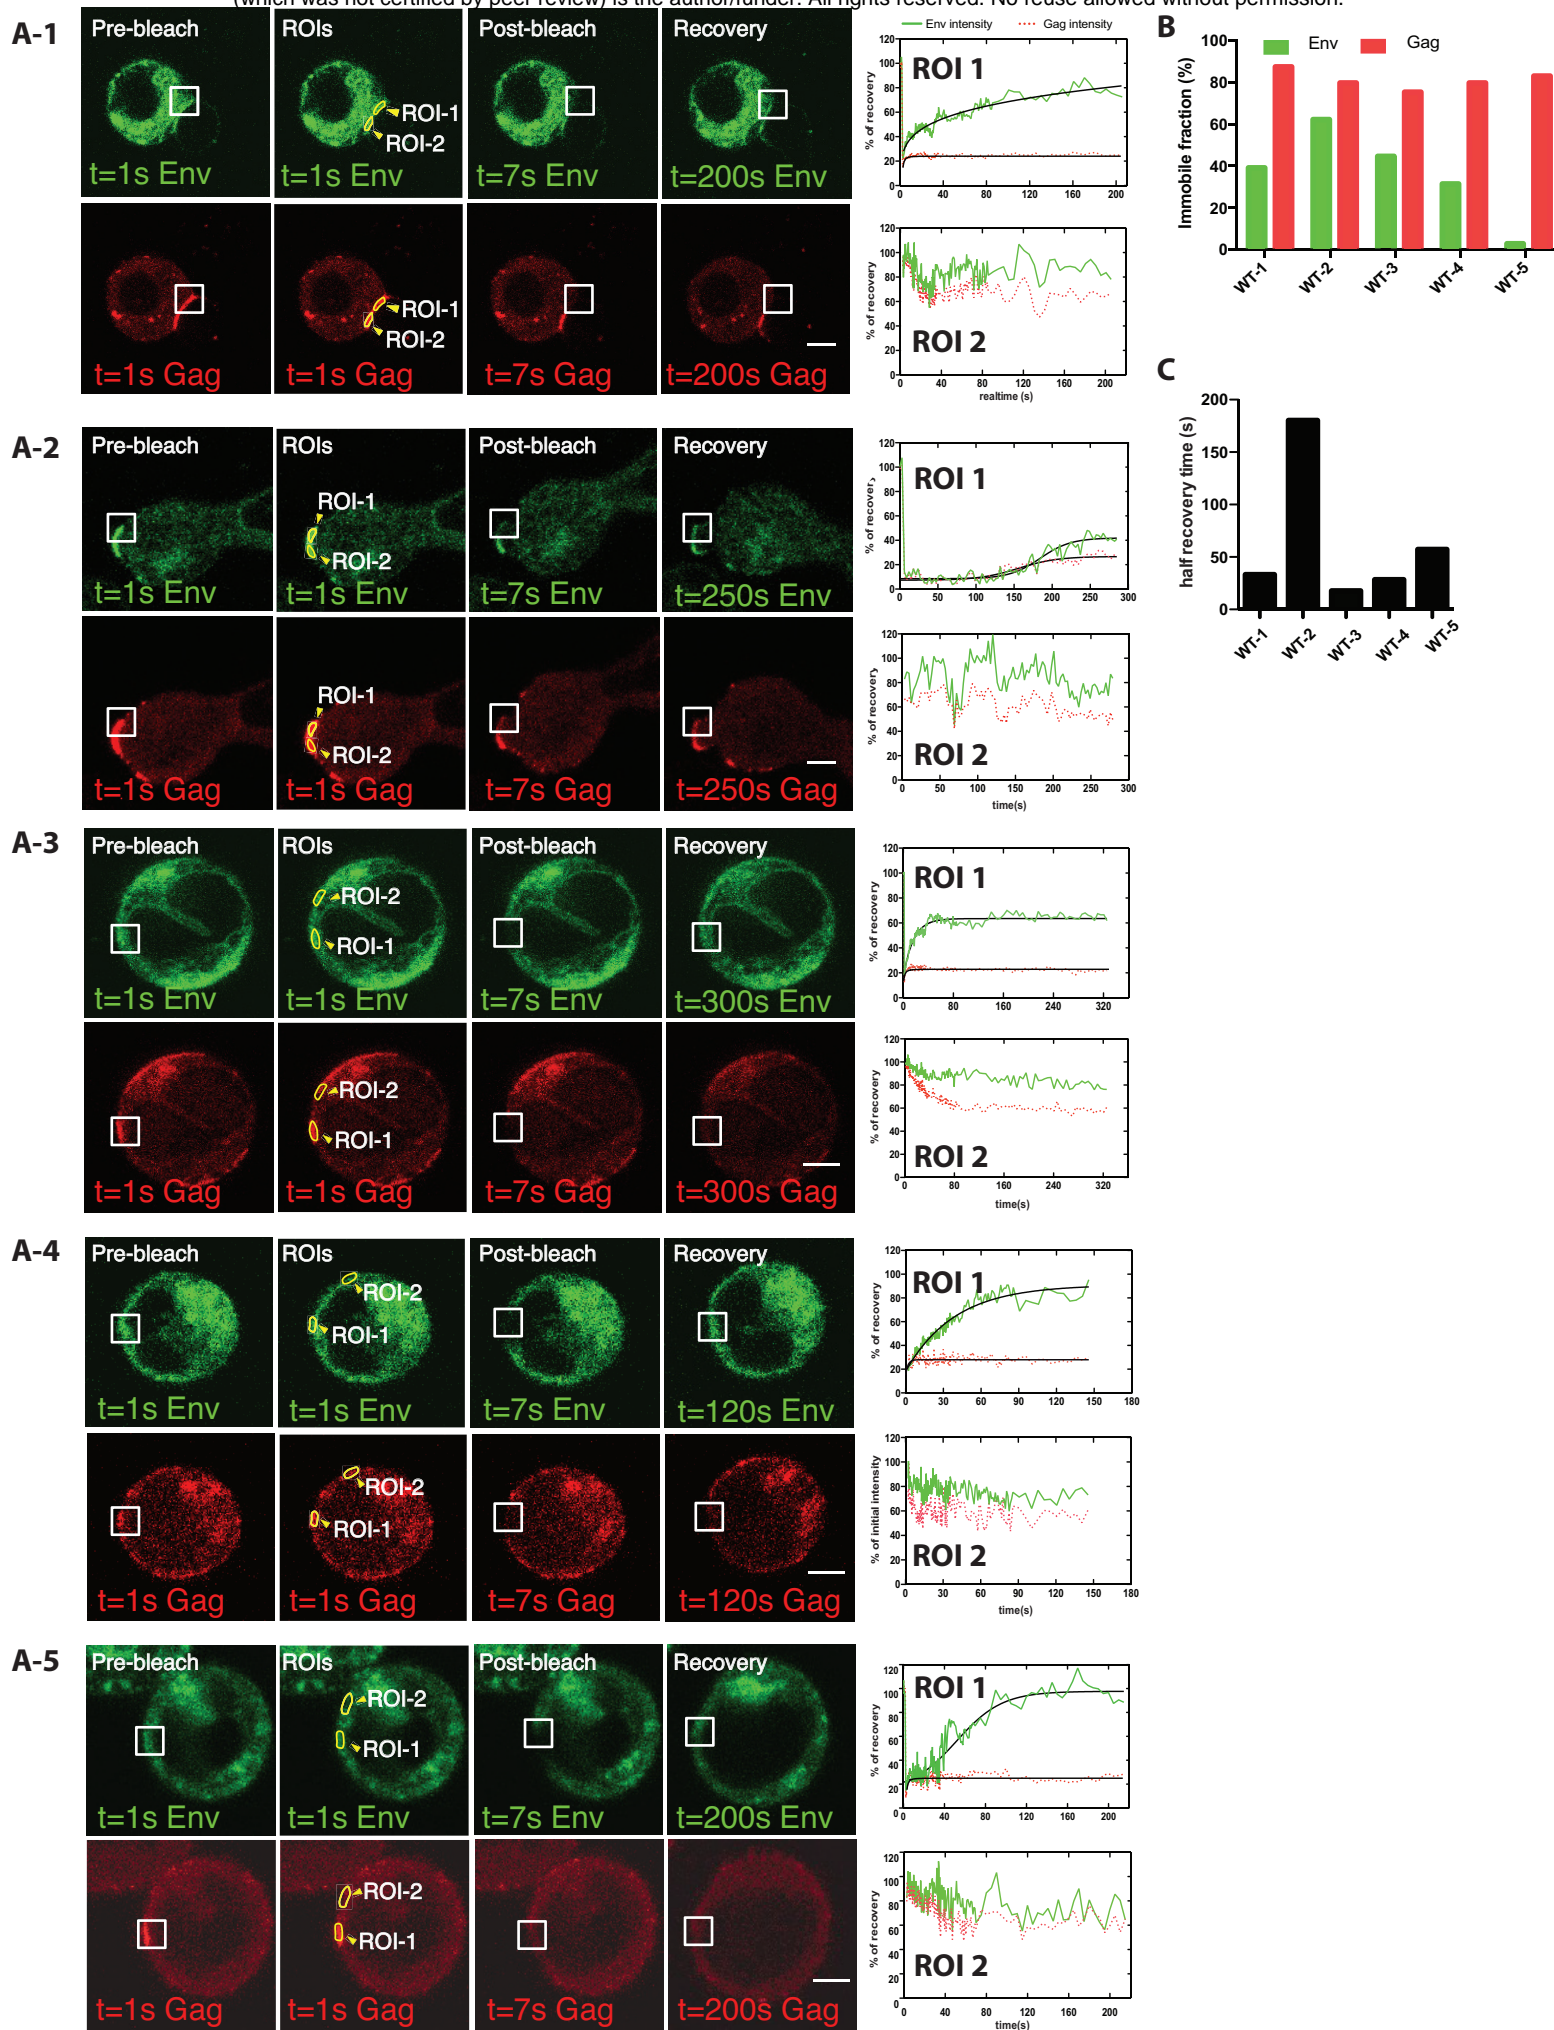

## Figure 6

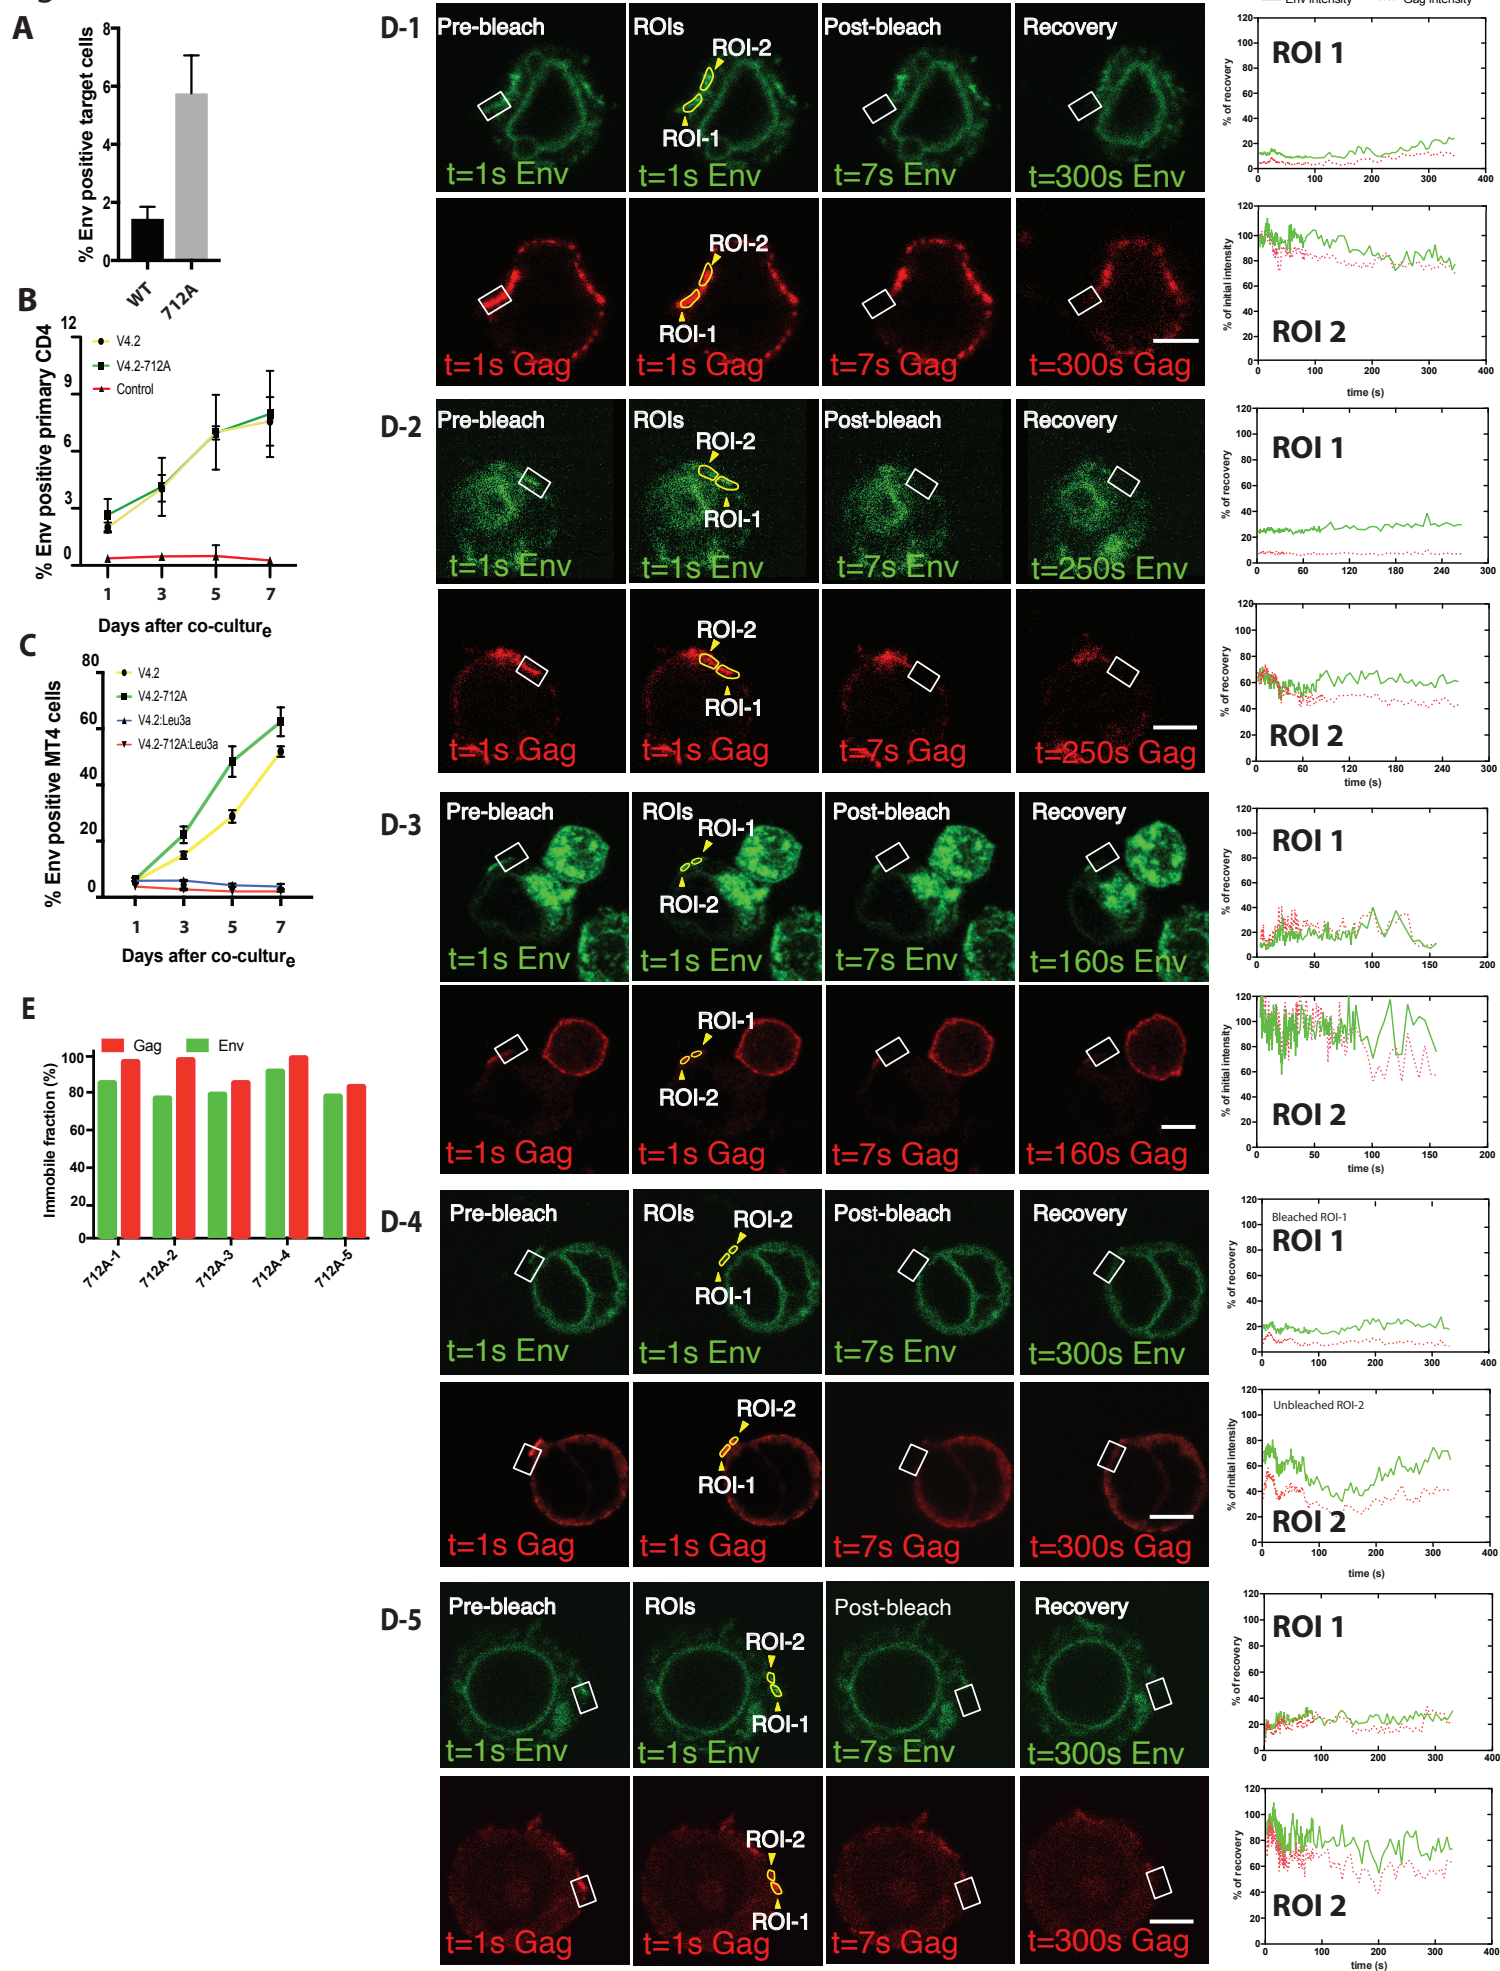

Figure 7

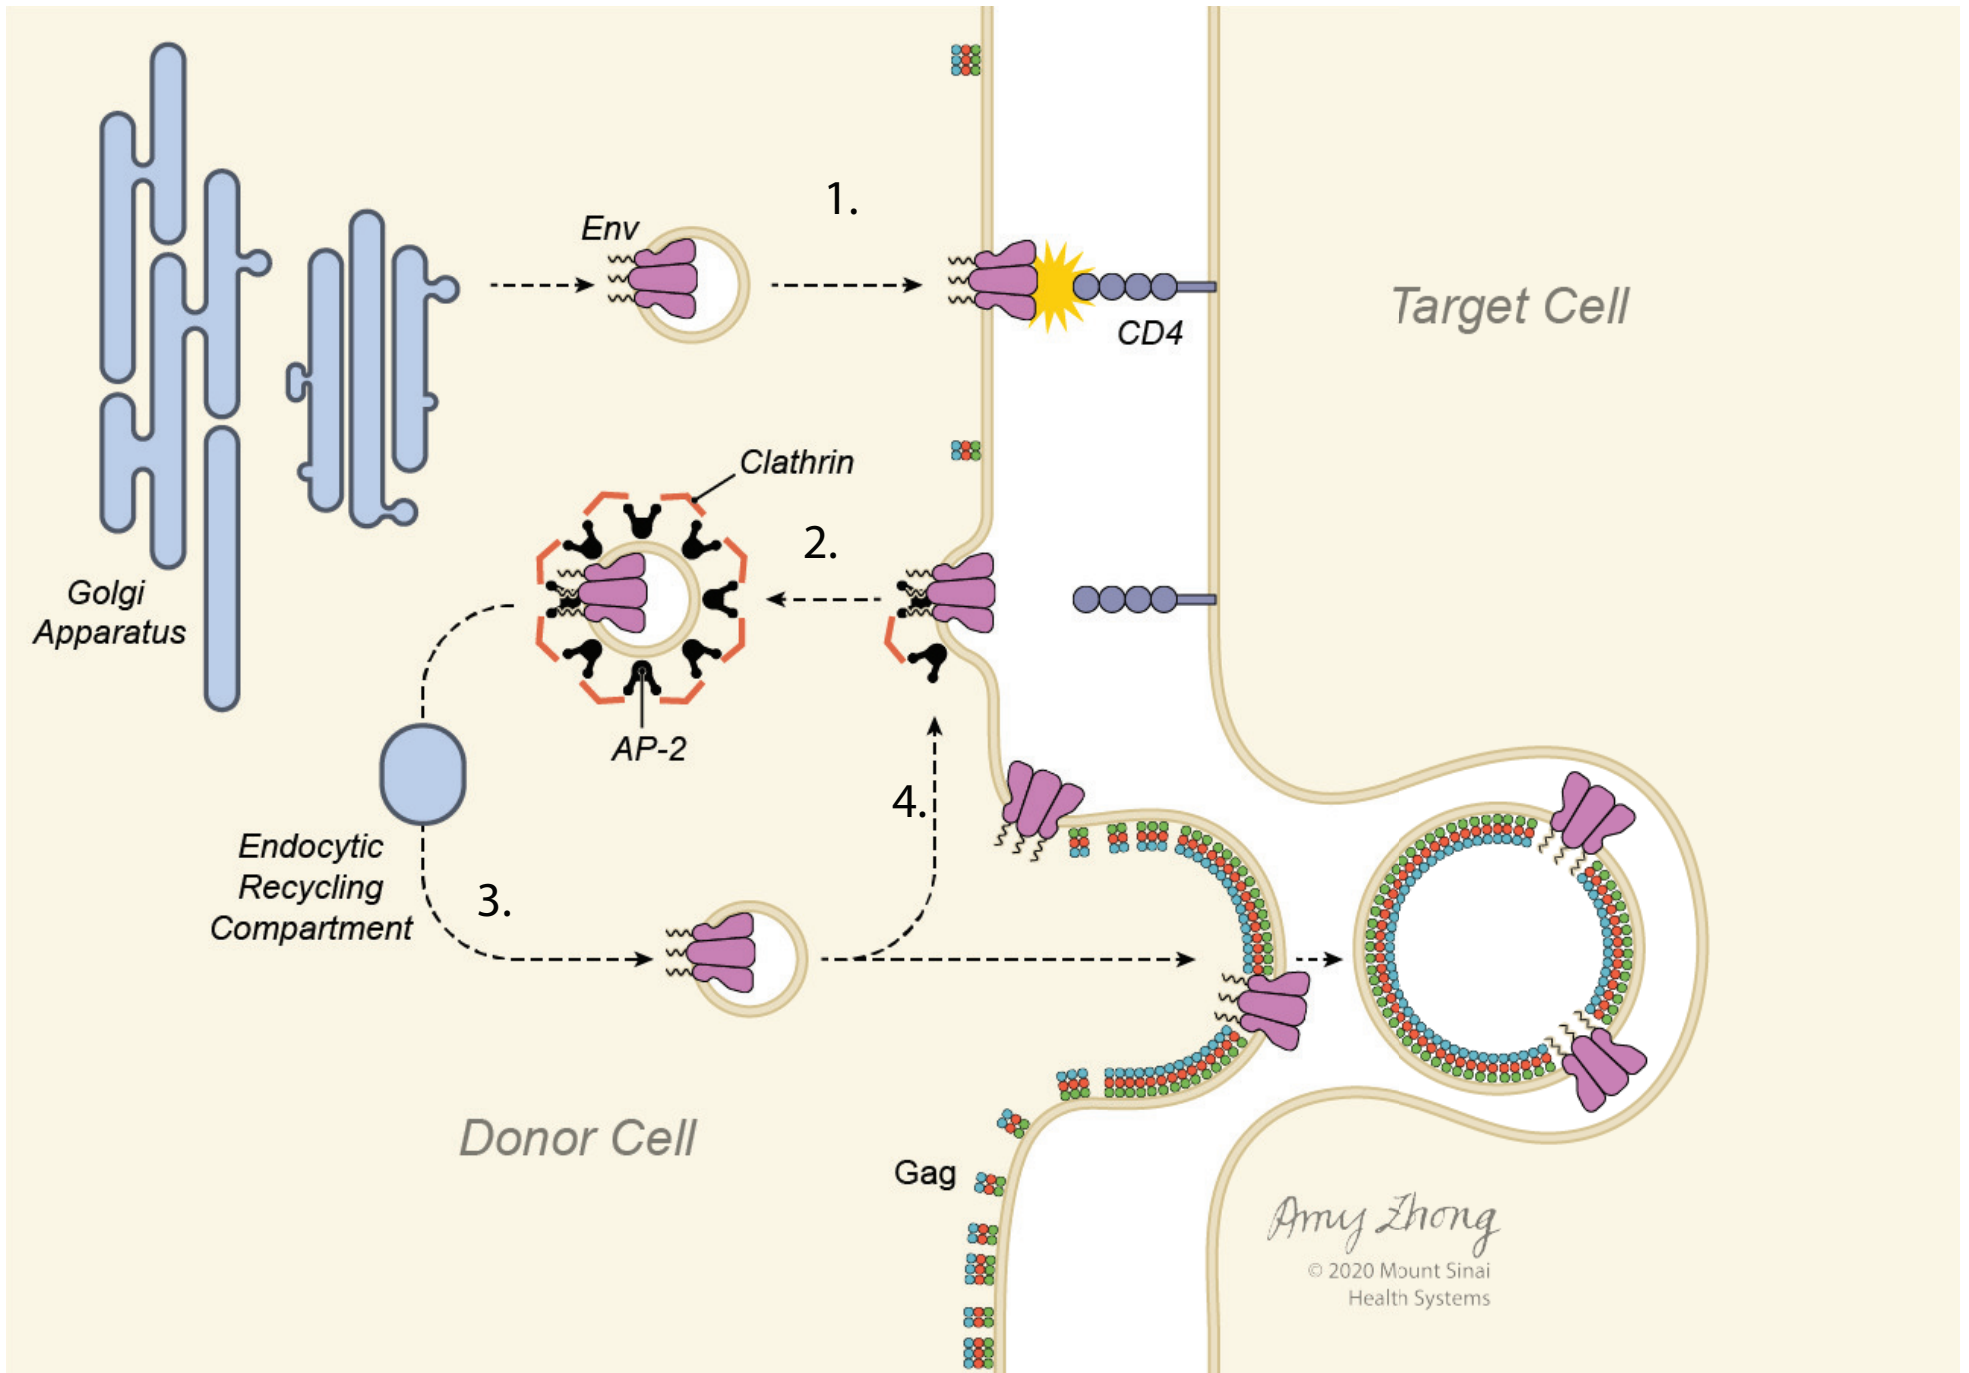

Source: https://www.biorxiv.org/content/10.1101/2020.12.08.417188v1.full.pdf
